# Supplementary material
Source: PubMed Central journal article supplement (PMC3261569)
Supplement: emboj2011458s1.pdf [file emboj2011458s1.pdf]

## Supplementary information

# **Extraordinary transgressive phenotypes of hybrid tomato are influenced by epigenetics and small silencing RNAs**

Padubidri V. Shivaprasad, Ruth M. Dunn, Bruno ACM Santos, Andrew Bassett, and David C. Baulcombe†

Department of Plant Sciences,  
University of Cambridge, Downing Street, Cambridge CB2 3EA, United Kingdom

Supplementary Information contains Supplementary Methods (Section 1), Supplementary Figures S1-S12 (Section 2), Supplementary Tables SI-SV (Section 3) and Supplementary References (Section 4).

## Section 1: Supplementary Methods

### ***RT-PCR and quantitative (q)PCR***

RPL2 was amplified using primers RPL2for 5'-ACACAAAGTTGTGA CCG TGG-3' and RPL2rev 5'-ACCATGAGGATGCTCCACAGG-3' with *Taq* DNA polymerase. Tomato GAPDH (238 bp amplicon) was amplified using GAPDHFor 5'-GGAGGAGGGAACAACAAGAGG-3' and GAPDHRev 5'-AGATGCCGTCAGTGCCGA-3'. A 543 bp fragment of *SIAPS1* was amplified using APS1For 5'- CGGGCTGATCGAGCCGGATG-3' and APS1 Rev 5'- GCAGGGGAAAGCCGGAACCTG-3'. Locus H06 fragment (335 bp) was amplified using H06for 5'- GTTGTAGAAGGCGAGGTGG -3' and H06rev 5'- GTCTCGTTTCCTCTCACACG -3'. PAL fragment (275 bp) was amplified using primers PALfor 5'-TCAGCAAGGAAAACCGCTGAGGC-3' and PALRev 5'- GGGTAGGTGGAGCTGCAGGGA-3'. Error bars indicate standard deviation.

### ***DNA Methylation assay***

Primers used for amplification are H06F1 5'-GGAAACGAATTCAAAAAGGAGAAGTATGA-3' and H06R1 5'-CTAGAGACCGAAATGCAAATCAAATTG-3'; 95°C 2 min, then 40 cycles of 95°C 20 s, 60°C 30 s, 72°C 30 s. Values are expressed as a percentage of the mock digested control. Three replicates were performed for each sample.

### ***Phylogenetic analysis***

Multiple alignment of PAL sequences was made using ClustalW2 (Larkin et al, 2007). The alignment was processed with Phylip (a maximum parsimony method, <http://www.phylip.com/>) package 3.69. Bootstrapping analysis was carried out using Phylip *seqboot* with 1000 replications. The output was processed with Phylip *protpars* program with randomized input order options and Phylip consensus was used to combine multiple trees. Tree was drawn using Dendroscope (Huson et al, 2007) program version 2.7.4.

## Section 2: Supplementary Figures

Supplementary Figures S1-S12.

## Section 3: Supplementary Tables

Supplementary Table titles-

**Supplementary Table I.** Primer sequences used for northern blot analysis.

**Supplementary Table SII.** Table showing 153 sRNA loci used for heatmap generation in Figure 2A. Values indicate transgressive index as described in text and Methods section.

**Supplementary Table SIII.** List of transgressive sRNA loci that are used for heatmap in Figure 3A. Unigenes and gene descriptions are given.

**Supplementary Table SIV.** Transgressive sRNA loci targeting cDNAs that are marked to show different transgressive features. MPV, mid parental value. Values are normalized sRNA counts.

**Supplementary Table SV.** Number of sRNA sequences matching four PALs identified from tomato Chromosome 9.

#### **Section 4: Supplementary References**

Huson DH, Richter DC, Rausch C, DeZulian T, Franz M, Rupp R (2007) Dendroscope: An interactive viewer for large phylogenetic trees. *BMC Bioinformatics* **8**: 460

Larkin MA, Blackshields G, Brown NP, Chenna R, McGettigan PA, McWilliam H, Valentin F, Wallace IM, Wilm A, Lopez R, Thompson JD, Gibson TJ, Higgins DG (2007) Clustal W and clustal X version 2.0. *Bioinformatics* **23**(21): 2947-2948

Supplementary Figures (S1 to S12)

**Extraordinary transgressive phenotypes of hybrid tomato are influenced by epigenetics and small silencing RNAs**

Padubidri V. Shivaprasad, Ruth M. Dunn, Bruno ACM Santos, Andrew Bassett, and David C. Baulcombe

Department of Plant Sciences,  
University of Cambridge, Downing Street, Cambridge CB2 3EA, United Kingdom

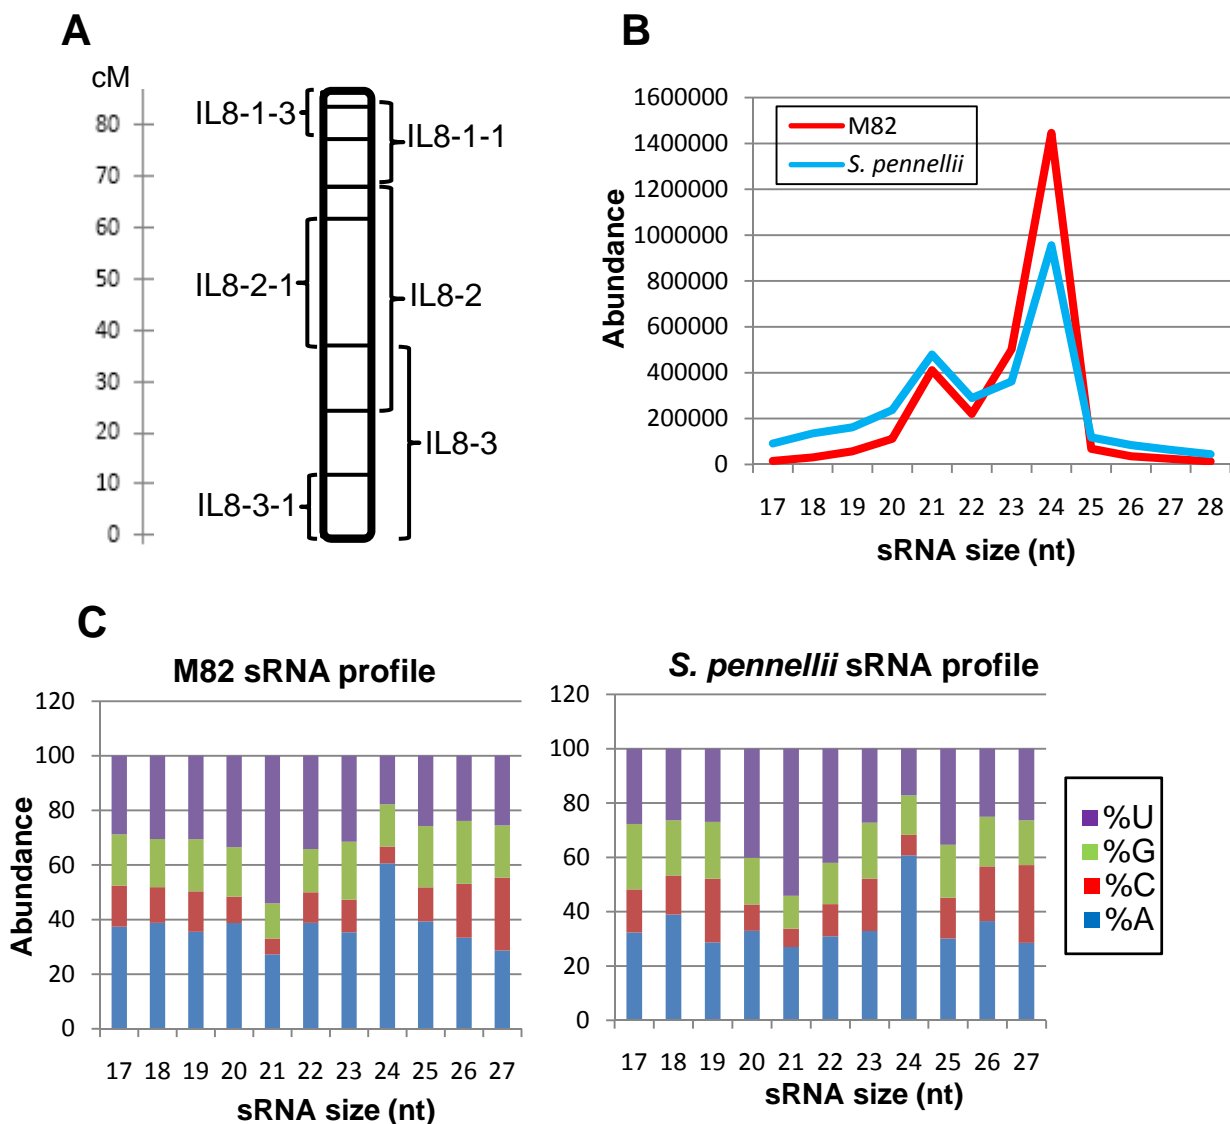

**Supplementary Figure 1.** (A). Map of chromosome 8 showing the locations of the *S. pennellii* regions inserted in introgression lines (redrawn based on Lippman et al, 2007). cM, centimorgan. (B). Profile of small RNAs from M82 and *S. pennellii*, showing abundance of small RNAs by size (length in base pairs). Counts are per million reads of cloned small RNA. (C). Profile of the first 5' nucleotide of sRNAs of different sizes in sRNA libraries from M82 (left panel) and *S. pennellii* (right panel).

## Variation in sRNA accumulation among F2 lines

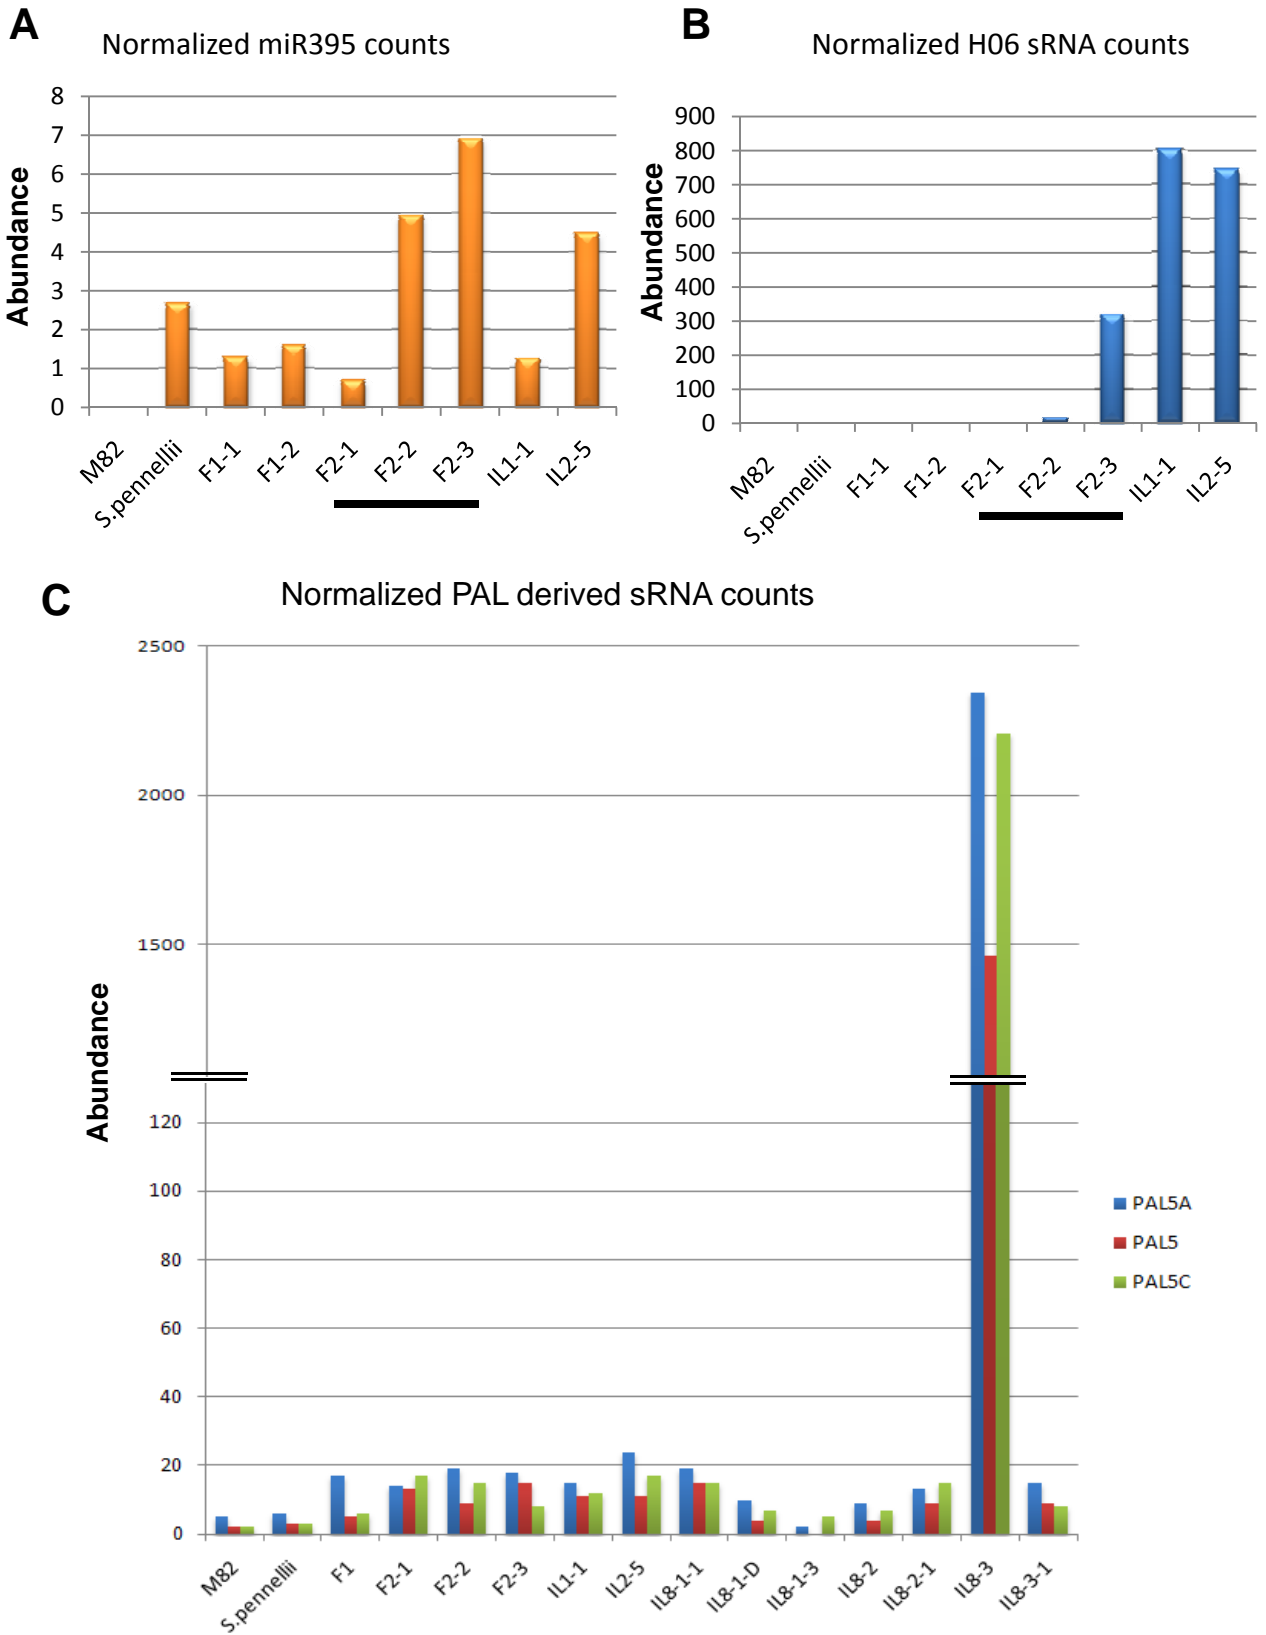

**Supplementary Figure 2.** (A). miR395 counts for tomato lines, normalised to library size. Three independent F2 lines are marked (black bar). (B). Counts of sRNAs aligning to genomic locus H06, counts normalised to library size. Three independent F2 lines are marked. (C). Counts of siRNAs aligning to three PALs (PAL5A: SGN-E235342, PAL5:SGN-E304219, PAL5C: SGN-E316424). Counts normalised to library size.

### A. miR395 accumulation upon salt stress

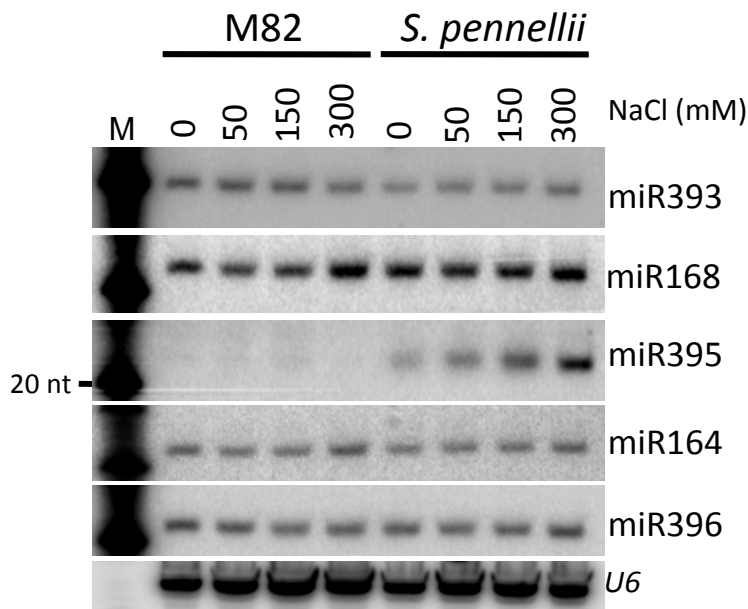

### B. miR395 accumulation upon sulphate stress

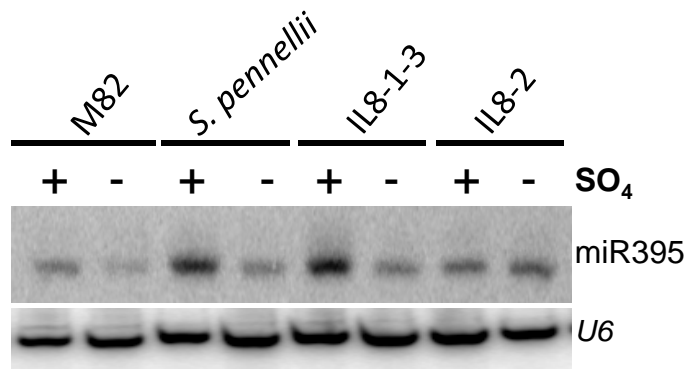

### C. Conserved miR395 targets

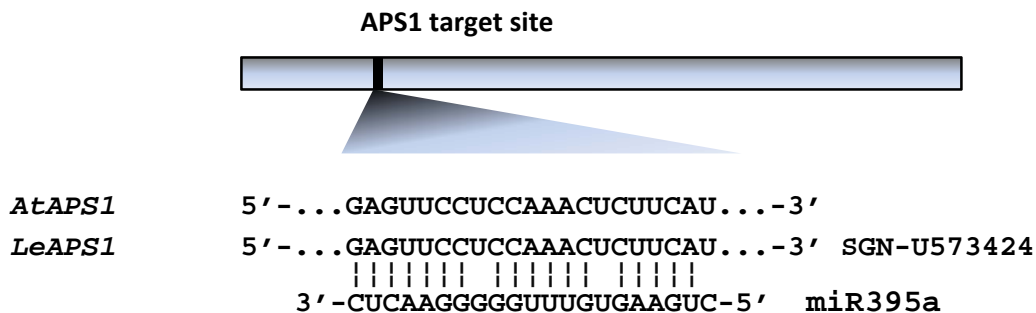

**Supplementary Figure 3.** (A). Accumulation of miR395 during salt stress in the two parental lines, M82 and *S. pennellii*. Primer sequences as in Supplementary Table S1. M, Size marker. (B). miR395 accumulation upon sulphate (SO<sub>4</sub>) stress. 3 week-old plants were grown in normal (+) or medium without sulphates (medium had chlorides instead of sulphates). (C). Alignment of miR395 to target sequences in the *APS1* from *Arabidopsis* and tomato. Analysis was performed using the MultiAlin (<http://bioinfo.genotoul.fr/multalin/multalin.html>) tool.

## A. Leaf phenotypes upon prolonged salt stress

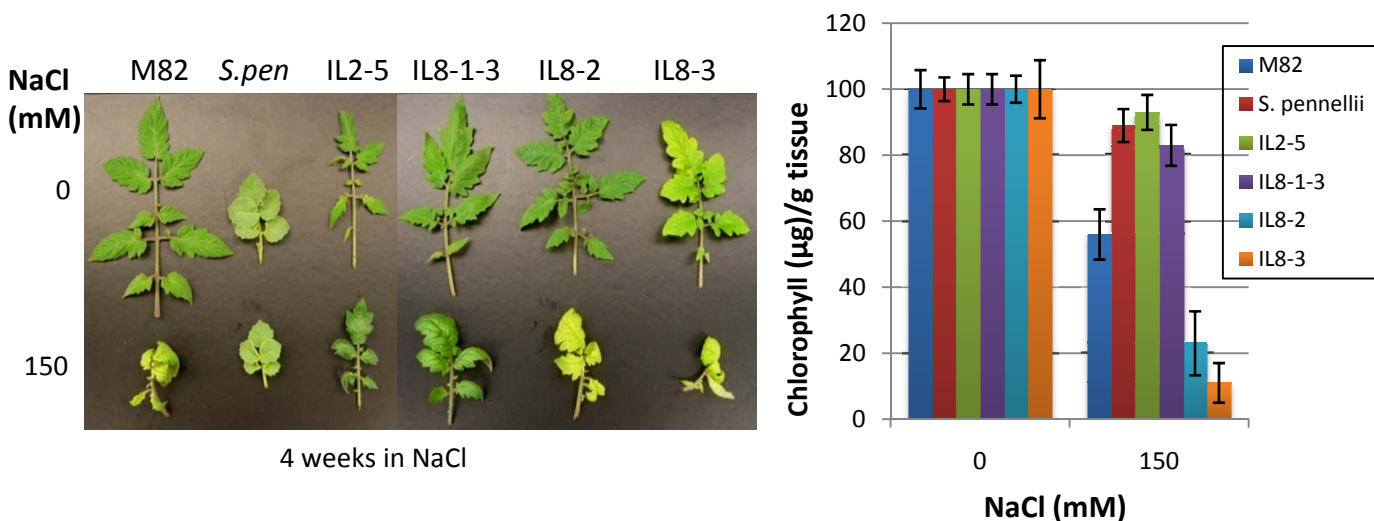

## B. Leaf curling upon salt stress

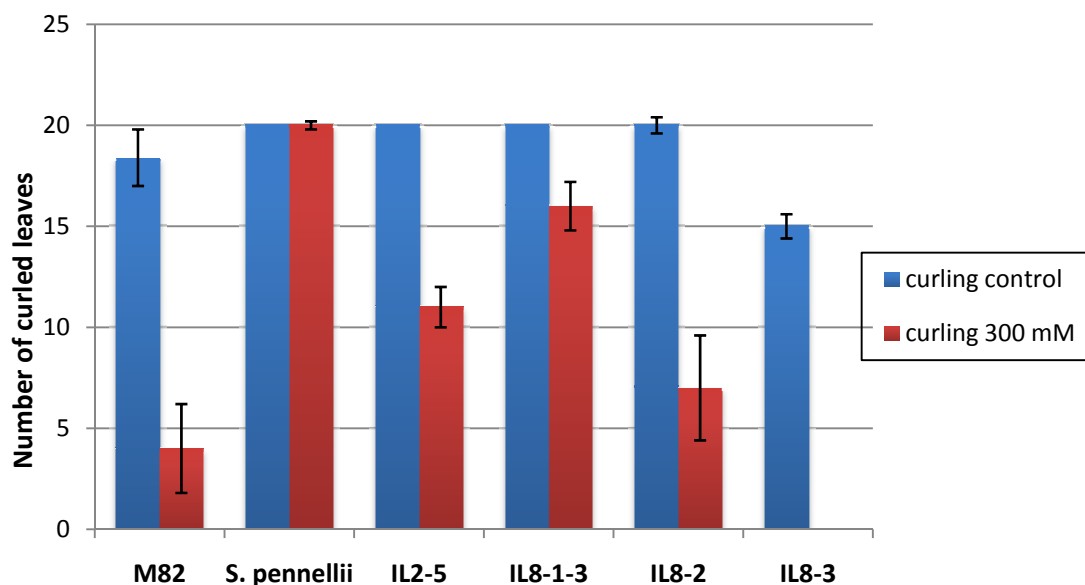

**Supplementary Figure 4. (A).** Phenotypes of leaves taken from salt treated tomato lines (left panel) and their chlorophyll content (right panel). Photograph taken 4 weeks upon treatment with salt. **(B).** Leaf curling phenotype upon salt stress. 20 leaves from 3 replicate experiments were scored for curling (terminal leaflet curled outwards more than 130°) from water treated (blue bars) or salt treated (red bars) plants. Note that all leaves were curled in IL8-3 upon salt stress while *S. pennellii* did not show curling in control and stressed conditions.



## A. Distribution of transgressive loci among tomato Chromosomes

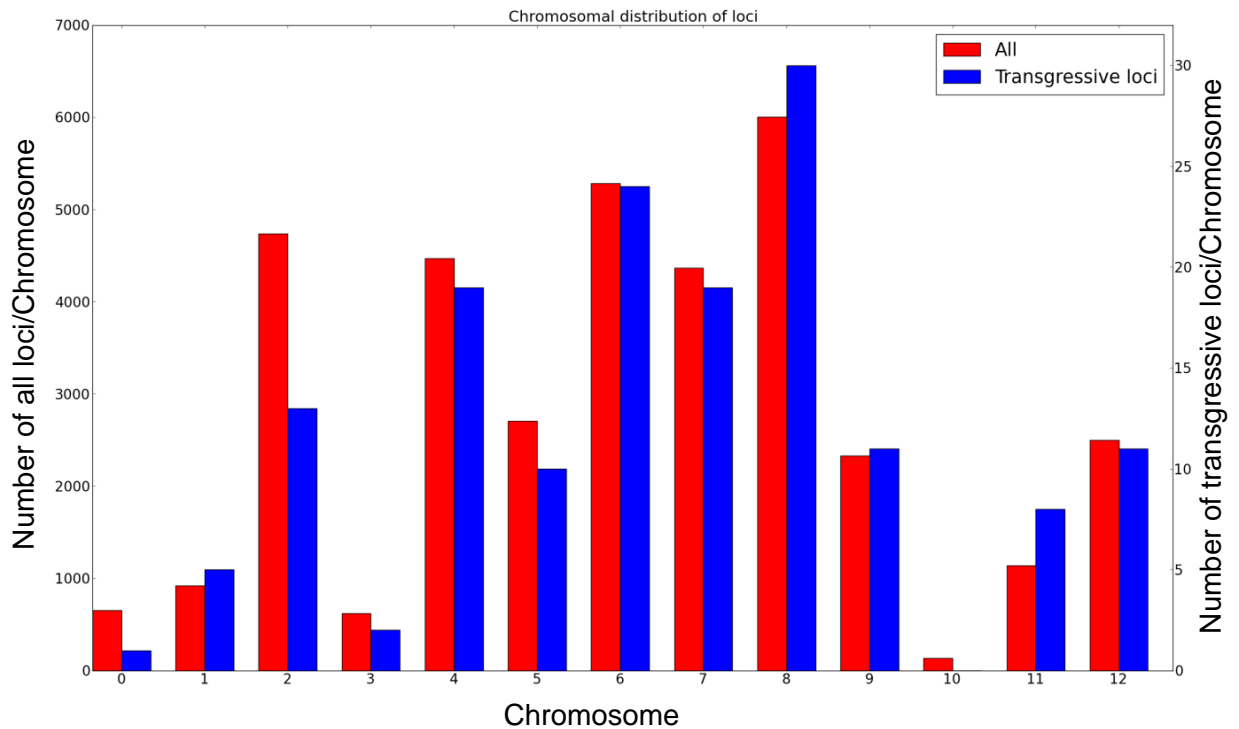

## B. Length of transgressive loci

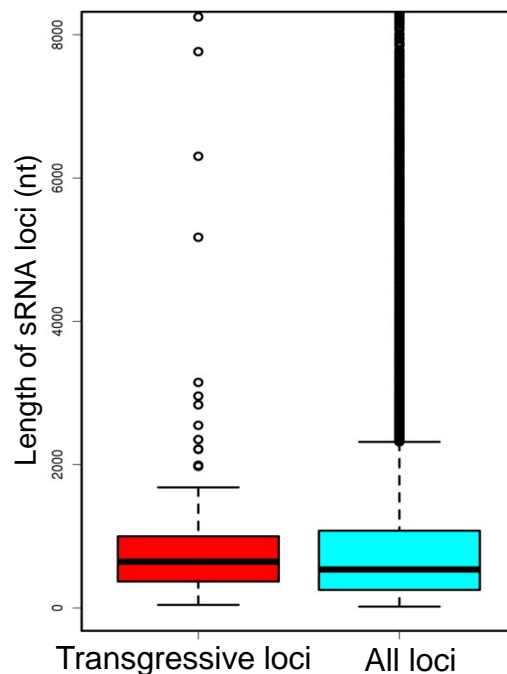

**Supplementary Figure 5.** Distribution and length of transgressive loci. **A.** Distribution of transgressive loci among 12 chromosomes of tomato. Chromosome 0 has sequences of unassigned Chromosomes. **B.** Boxplot showing average length of 153 transgressive loci in comparison to all sRNA loci.

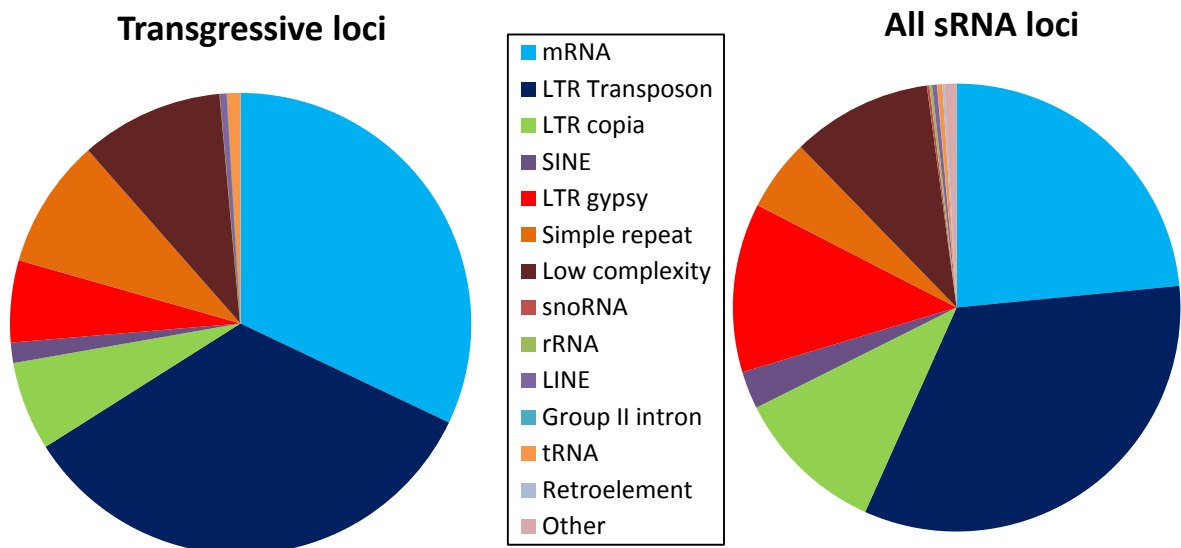

**Supplementary Figure 6.** Annotation of sRNA loci.

### A. Strand bias

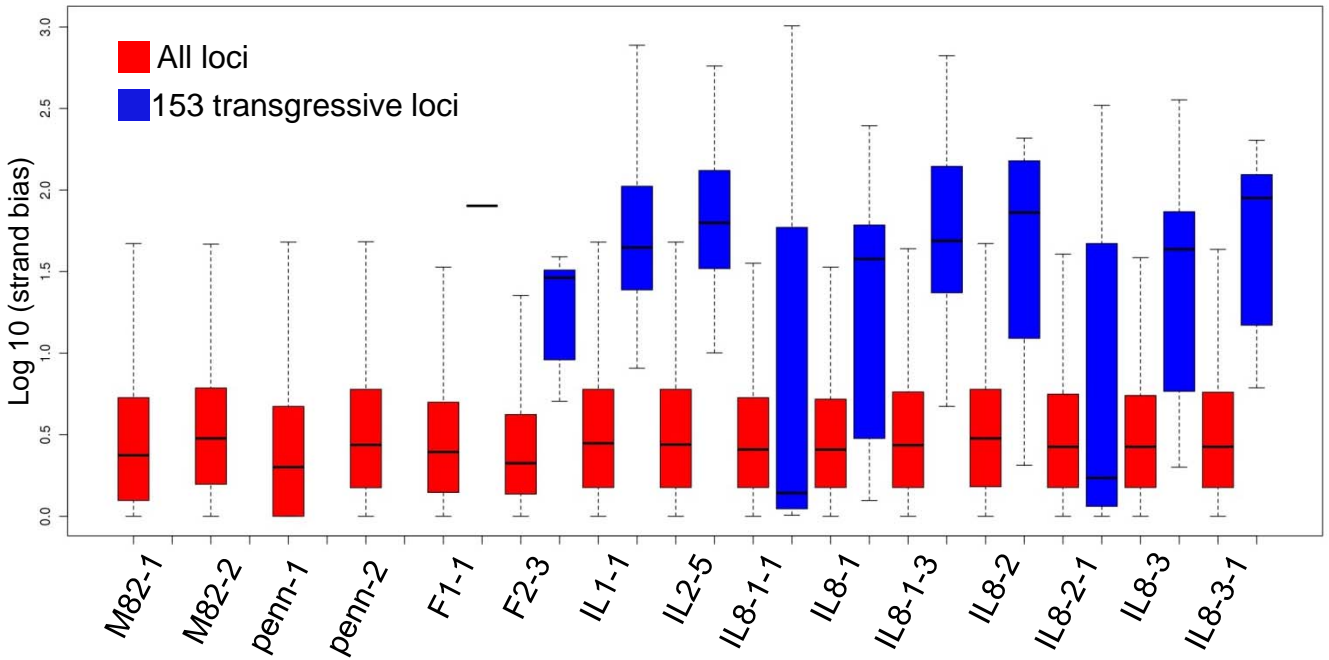

### B. Size distribution of sRNAs among transgressive loci

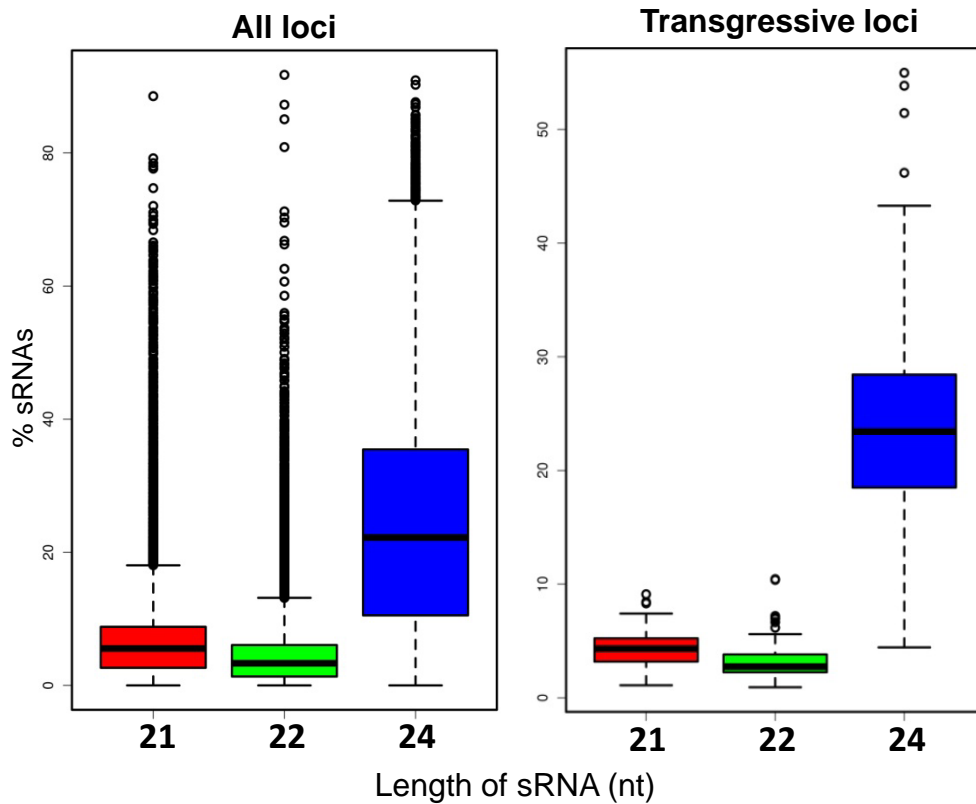

**Supplementary Figure 7.** Strand bias and sRNA length among transgressive sRNA loci. (A). Strand bias among transgressive loci. Transgressive loci are present only among ILs and F2-3 where they show slight strand bias. (B). Size distribution of sRNAs among transgressive loci.

Graph showing abundance and distribution of H06 sRNAs

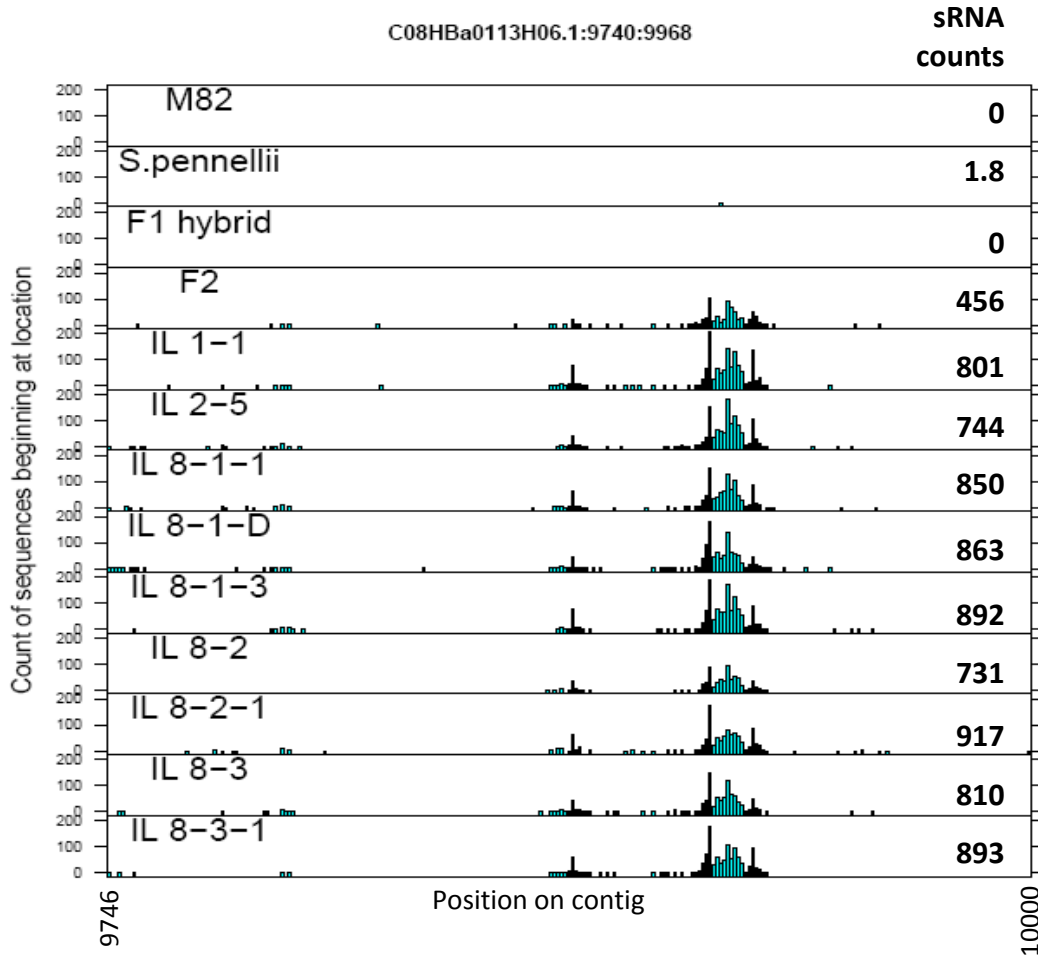

**Supplementary Figure 8.** Graph showing the number of sRNAs which have a first base pair mapping to each position across the H06 350 bp region of Chromosome 8. Reads matching sense strand (black bars) and antisense strand (green) are shown.

## A. Bisulphite sequencing analysis of H06 locus

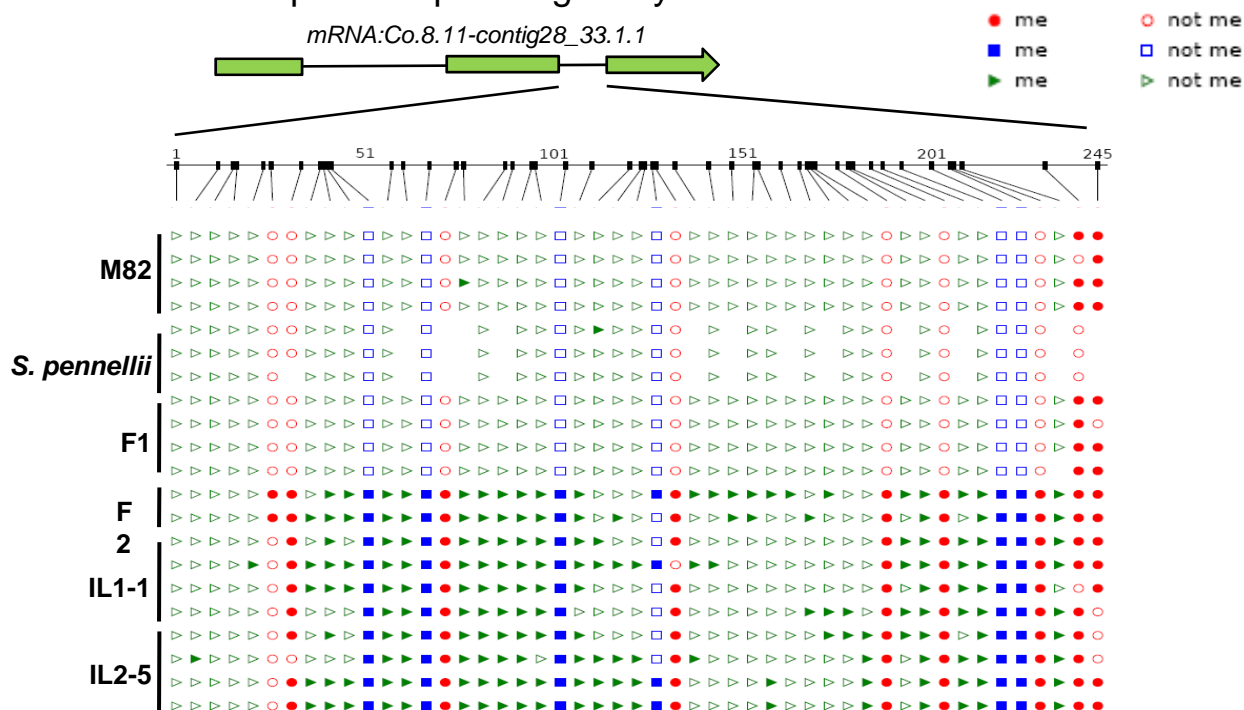

## B. Methylation across H06 locus among parents and hybrids

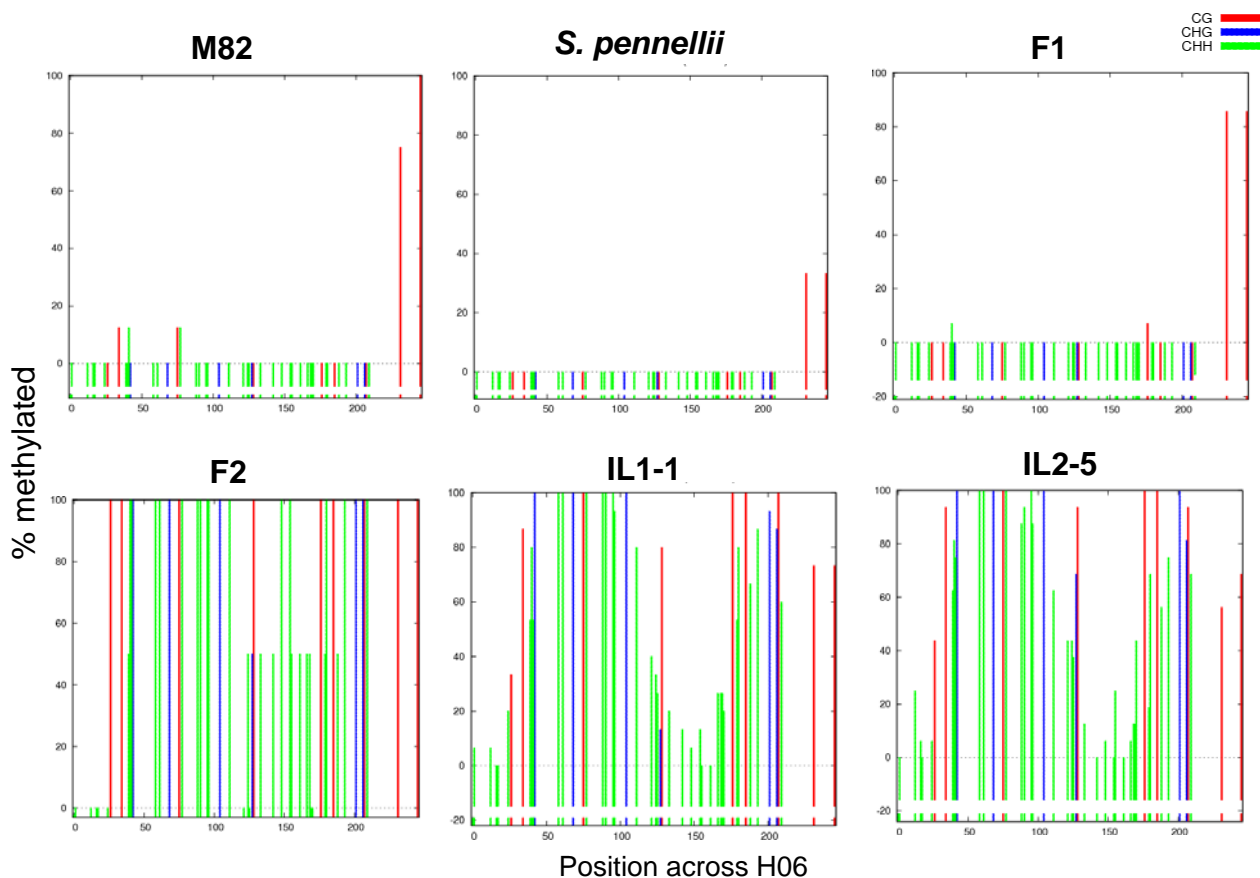

**Supplementary Figure 9.** Bisulphite sequencing analysis of H06 DNA in parental lines and hybrids. PCR products were cloned into pGEM-T easy and sequenced. Each sample had at least 10 independent clones. (A). Analysis of Bisulphite data by Cymate tool (red circles CG methylation; blue squares CHG methylation and Green arrows, CHH methylation). me, methylated (B). Distribution of methylation across H06 region.

# Browser views of 4 PAL sequences in Chromosome 9

CO9SLe0130H12.3

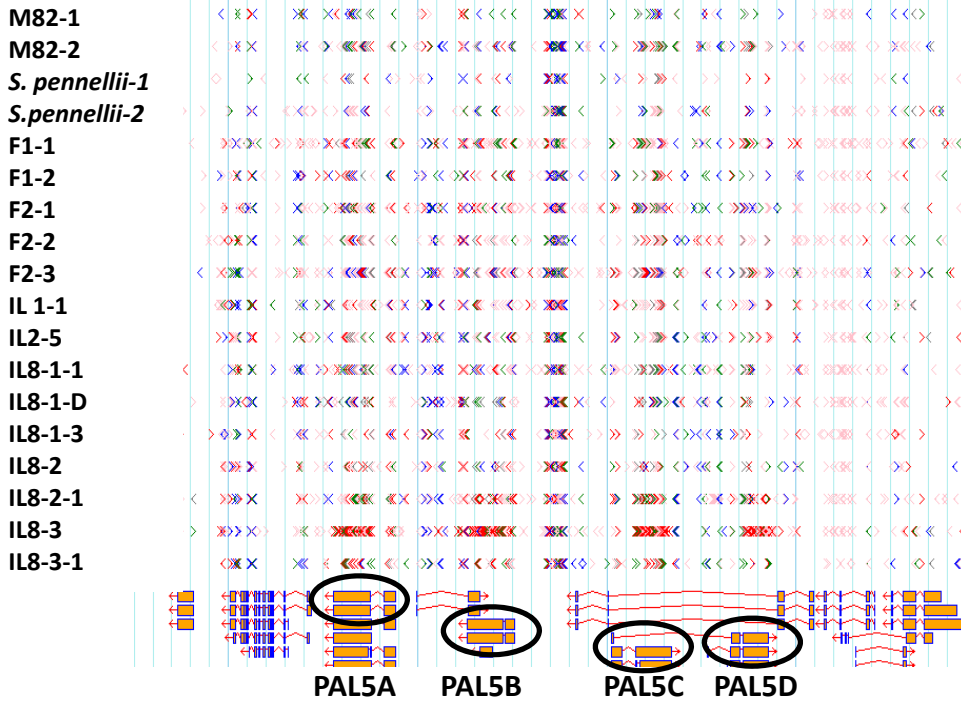

PAL5A

PAL5B

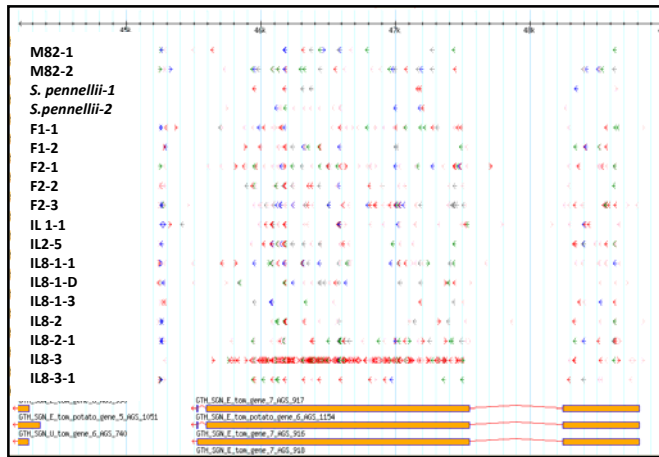

PAL5C

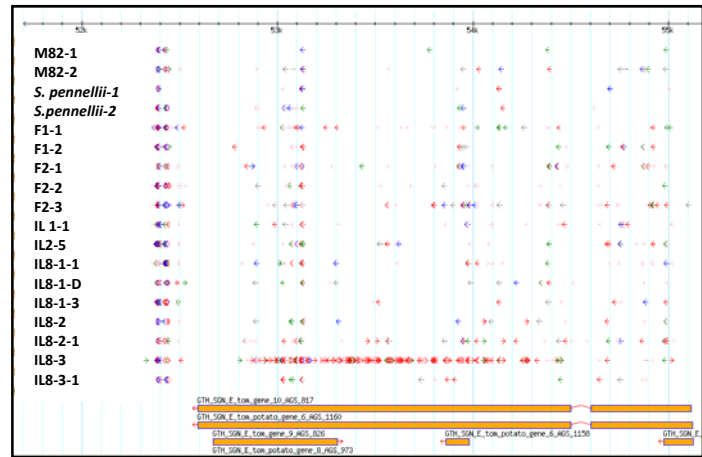

PAL5D

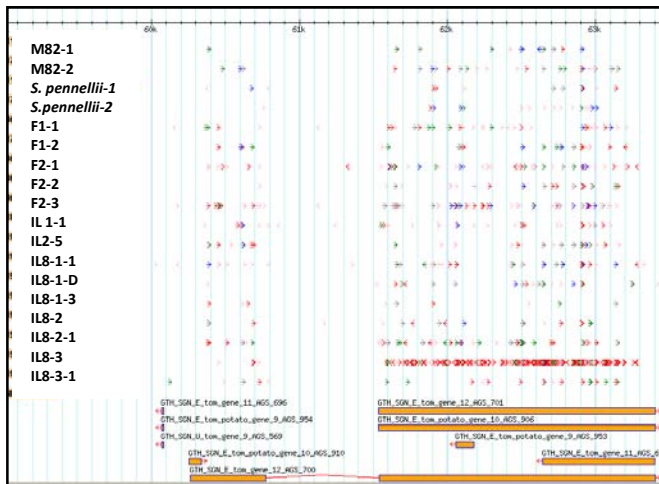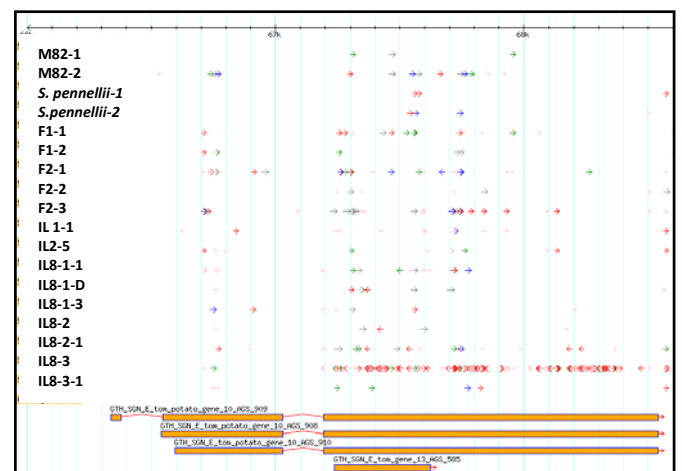

**Supplementary Figure 10.** Genome Browser view of genomic locations of four *PAL* sequences. Four individual *PALs* are named and alignment of sRNAs from small RNA datasets including IL8-3 for all four *PAL* sequences is shown in individual panels.

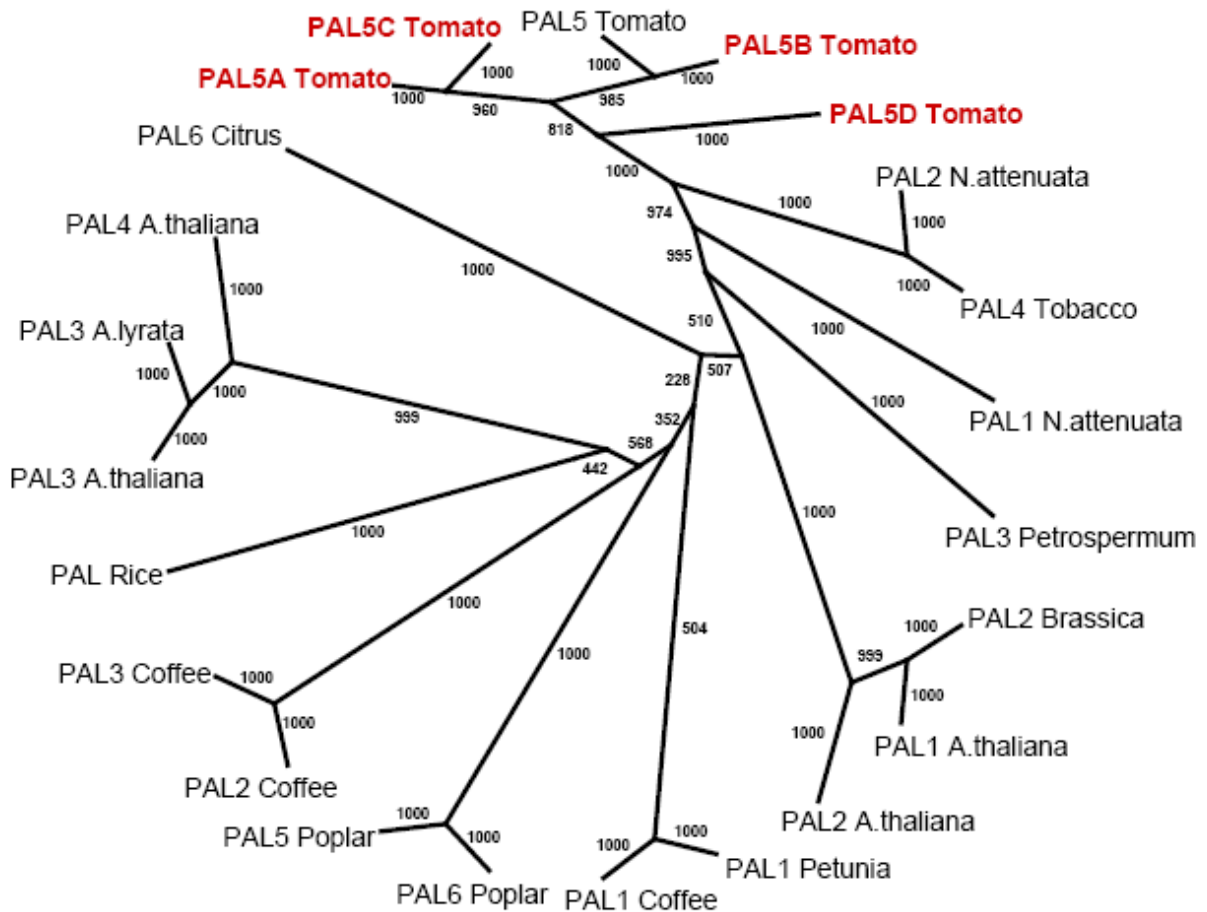

**Supplementary Figure 11.** An unrooted consensus phylogenetic tree to show relationships between some plant PAL family members and four new Tomato PAL sequences. Values at branches are bootstrapping values. Phylogenetic analysis is described in Supplementary Methods section. 4 PAL sequences from tomato Chromosome 9 are shown in red. Sequences used: PAL1 (*A. thaliana*) NP\_181241.1; PAL1 (*Petunia*) AAV98199.1; PAL1 (*Nicotiana attenuata*) ABG75910.1; PAL1 (Coffee) ABG75910.1; PAL2 (*A. thaliana*) NP\_190894.1; PAL2 (Coffee) AAN32867.1; PAL2 (*Brassica*) ABY89691.1; PAL2 (*N. attenuata*) ABG75911.1; PAL3 (*A. thaliana*) NP\_196043.2; PAL3 (Coffee) CAJ41418.1; PAL3 (*A. lyrata*) XP\_002871081.1; PAL3 (*Petrospermum*) P45729.1; PAL4 (*A. thaliana*) NP\_187645.1; PAL4 (Tobacco) ACJ66298.1; PAL5 (Tomato) AAA34176.1; PAL5 (Poplar) ACC63891.1; PAL5 (Citrus) AAB67733.1; PAL6 (Poplar) EEF01480.1.

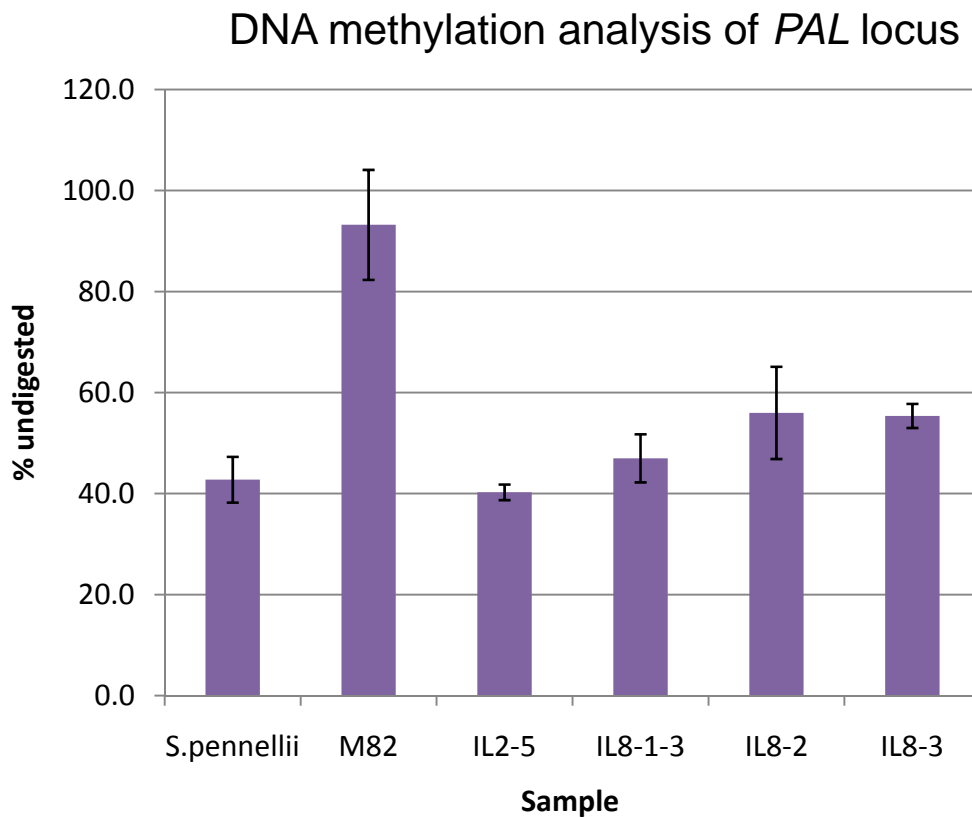

**Supplementary Figure 12.** DNA methylation analysis of *PAL* locus. Analysis was performed as described in Methods Section. A 209 bp target region was amplified by quantitative PCR from 40 ng digested DNA using SYBR Green JumpStart *Taq* ReadyMix (Sigma S9194) (*PAL* For 5'-GACCCTTTGATGCAGAAGCTGAGACA-3', *PAL*Rev 5'-CCGCATTCTGTGATCCTGTTAGGAA-3'; 95°C 2 min, then 40 cycles of 95°C 20 s, 60°C 30 s, 72°C 30 s). Values are expressed as a percentage of the mock digested control. Three replicates were performed for each sample.



**Supplementary Table I.** Primer sequences used for northern blot analysis.

| <b>Probe name</b> | <b>Probe sequence (5' to 3')</b> |
|-------------------|----------------------------------|
| miR164            | TGCACGTGCCCTGCTTCTCCA            |
| miR168            | GTCCCGACCTGCACCAAGCGA            |
| miR171            | GATATTGGCGCGGCTCAATCA            |
| miR319            | AGGGAGCTCCCTTCAGTCCAA            |
| U6                | GGCCATGCTAATCTTCTGTATCGTT        |
| miR395            | GGAGTTCCCCAAACTTCAG              |
| miR396            | CAGTTCAAGAAAGCTGTGGAA            |
| miR393            | GGATCAATGCGATCCCTTTGGA           |
| H06 a             | GCGTCTTCAGACAATAGTAGATTT         |
| H06 b             | TCTTGTTGTGTCTTCCTCCGTAGC         |
| PAL siRNA         | AGGACTTGTCTCAGCTTCTGC            |

**Supplementary Table SII.** Table showing 153 sRNA loci used for heatmap generation in Fig. 3A. Values indicate transgressive Index as described in Methods section.

| Genomic Locus          | M82-1 | M82-2 | S.penn-1 | S.penn-2 | F1-1 | F2-3  | IL1-1  | IL2-5  | IL8-1-1 | IL8-1D | IL8-1-3 | IL8-2 | IL8-2-1 | IL8-3  | IL8-3-1 |
|------------------------|-------|-------|----------|----------|------|-------|--------|--------|---------|--------|---------|-------|---------|--------|---------|
| C08HBa0113H06.1_9731   | 0.0   | 0.0   | 2.0      | 0.0      | 0.0  | 245.5 | 1407.7 | 1284.3 | 1097.4  | 1224.5 | 1490.8  | 724.9 | 1144.6  | 1012.7 | 1325.1  |
| C06HBa0310B09.1_114490 | -1.8  | 1.4   | -269.5   | -141.5   | -6.6 | -13.4 | 4.7    | -1.5   | -8.7    | 3.5    | 12.4    | -1.4  | -2.6    | 1.9    | 2.0     |
| C06HBa0153G23.1_45626  | -1.8  | 1.4   | -269.5   | -141.5   | -6.6 | -13.4 | 4.7    | -1.5   | -8.7    | 3.5    | 12.4    | -1.4  | -2.6    | 1.9    | 2.0     |
| C05SLm0005B15.1_62823  | 0.0   | 2.0   | 0.0      | 0.0      | 1.1  | 1.4   | 54.4   | 56.0   | 34.7    | 55.1   | 79.0    | 70.1  | 71.6    | 3.2    | -2.0    |
| C07HBa0037F23.1_2254   | 0.0   | 1.7   | 0.0      | 2.0      | 1.9  | 11.4  | 44.0   | 23.8   | 42.2    | 44.7   | 23.3    | 58.8  | 70.5    | 54.0   | 22.8    |
| C08SLe0082C24.1_62428  | 1.2   | -1.3  | 0.0      | -1.7     | 0.0  | 23.7  | 84.1   | 62.6   | 0.0     | 6.4    | 91.2    | 73.3  | 90.3    | 92.0   | 99.2    |
| C02HBa0040B13.1_82475  | 1.2   | -1.3  | 0.0      | 1.2      | 0.0  | 44.7  | 32.2   | 0.0    | 135.2   | 1.4    | 55.7    | 144.5 | 179.9   | 116.8  | 124.2   |
| C07SLm0093E04.2_52824  | 0.0   | 2.0   | 0.0      | 1.6      | 0.0  | 68.6  | 1.7    | 0.0    | 0.0     | 5.6    | 1.8     | 1.9   | 0.0     | 0.0    | 237.1   |
| C06HBa0307J13.1_20725  | 1.1   | -2.2  | -1.3     | 1.3      | 2.3  | 1.6   | 1.2    | -1.3   | 20.3    | 1.7    | 1.5     | -2.4  | 10.2    | 1.7    | 1.4     |
| C06HBa0301C21.1_123626 | 1.1   | -2.2  | -1.3     | 1.3      | 2.3  | 1.6   | 1.2    | -1.3   | 20.3    | 1.7    | 1.5     | -2.4  | 10.2    | 1.7    | 1.4     |
| C11HBa0054I23.2_2977   | 1.1   | -1.1  | 0.0      | 1.6      | 1.0  | 1.6   | -1.0   | 1.3    | 18.4    | 1.5    | 1.9     | -1.2  | 9.9     | -1.6   | -1.1    |
| C04HBa0128L09.1_55084  | -3.6  | 1.2   | 0.0      | 2.0      | 1.3  | 1.2   | 1.3    | 2.4    | 20.1    | 2.1    | 1.1     | 1.6   | 11.2    | 1.9    | 1.5     |
| C11HBa0027B05.1_160627 | -2.1  | 1.5   | -2.0     | 1.4      | 1.4  | 4.2   | 2.9    | 1.0    | 19.0    | 1.4    | 3.6     | 2.0   | 9.9     | -1.2   | 2.1     |
| C02HBa0329G05.3_43554  | 1.0   | -1.0  | -1.9     | -1.6     | -1.4 | 1.4   | 1.1    | 1.6    | 22.3    | 1.8    | 2.0     | 1.0   | 10.1    | 2.3    | -1.3    |
| C04HBa0204I09.1_44407  | 1.1   | -1.1  | -3.5     | -1.0     | 1.4  | -1.1  | 1.8    | 1.2    | 21.6    | 1.5    | 2.1     | 1.5   | 11.9    | 1.1    | -2.9    |
| C08SLm0066D16.1_50268  | -1.1  | 1.1   | -3.3     | 1.0      | -1.6 | -1.4  | 1.6    | 2.8    | 23.9    | 2.4    | 1.5     | 1.5   | 10.4    | 1.7    | 1.1     |
| C08SLe0028K16.1_832    | 0.0   | 2.0   | 0.0      | -2.9     | 1.3  | -1.5  | 2.5    | 1.1    | 20.1    | 2.9    | 1.8     | -2.4  | 8.9     | 2.0    | -1.5    |
| C08HBa0022O08.1_3499   | 0.0   | 2.0   | 0.0      | -2.9     | 1.3  | -1.5  | 2.5    | 1.1    | 20.1    | 2.9    | 1.8     | -2.4  | 8.9     | 2.0    | -1.5    |
| C08SLe0008I14.1_76712  | -1.0  | 1.0   | -1.4     | -4.3     | 1.5  | -1.0  | 2.2    | 1.3    | 21.4    | 1.7    | -1.1    | -1.8  | 9.4     | 1.1    | 1.0     |
| C02HBa0040B13.1_105145 | 1.2   | -1.3  | 0.0      | -2.8     | 0.0  | -3.8  | -1.1   | -1.5   | 17.2    | 1.3    | -1.8    | -1.8  | 8.1     | 1.4    | -1.1    |
| C06SLe0045F21.1_42095  | -1.2  | -1.6  | 0.0      | 2.0      | 1.2  | 4.4   | 2.6    | 3.1    | 12.2    | 3.5    | 2.6     | -1.2  | 8.7     | 1.5    | 1.1     |
| C06SLe0039G15.1_78263  | -1.2  | -1.6  | 0.0      | 2.0      | 1.2  | 4.4   | 2.6    | 3.1    | 12.2    | 3.5    | 2.6     | -1.2  | 8.7     | 1.5    | 1.1     |
| C08HBa0197A05.1_72989  | -1.3  | 1.2   | -2.5     | -1.8     | -1.2 | 1.2   | 1.9    | 2.7    | 15.7    | 4.1    | 3.1     | 1.8   | 7.7     | 1.3    | 1.2     |
| C11HBa0064J13.2_90570  | 1.1   | -3.6  | -1.1     | 1.1      | -3.2 | 1.4   | 1.9    | 1.2    | 17.7    | 2.1    | 2.2     | 1.4   | 8.6     | -1.6   | 1.7     |
| C06HBa0066P09.1_49867  | 1.0   | -1.0  | -1.9     | 1.3      | 1.4  | 2.0   | 3.3    | 2.7    | 17.2    | 5.7    | 3.8     | 3.6   | 11.4    | 5.2    | 3.8     |
| C02HBa0228I09.1_80757  | -1.0  | 1.0   | 0.0      | -12.6    | 1.3  | -4.1  | 1.8    | 1.4    | 10.0    | 3.1    | 1.2     | 1.9   | 15.0    | 0.0    | 1.9     |
| C02HBa0165K22.1_42119  | -1.0  | 1.0   | 0.0      | -12.6    | 1.3  | -4.1  | 1.8    | 1.4    | 10.0    | 3.1    | 1.2     | 1.9   | 15.0    | 0.0    | 1.9     |
| C04HBa0077O05.2_50931  | -2.0  | 1.3   | -1.3     | 1.2      | 2.5  | 1.1   | 1.1    | 1.5    | 12.0    | 2.6    | 2.3     | 1.2   | 6.1     | 2.3    | 1.1     |
| C05SLm0118J18.1_1260   | -1.7  | 1.3   | -1.0     | 1.0      | -1.1 | -1.1  | 1.5    | 1.1    | 9.6     | 1.0    | 1.3     | 1.6   | 5.9     | 1.6    | -1.4    |
| C08HBa0058M16.1_17030  | -1.0  | 1.0   | -2.1     | -1.2     | -1.2 | 1.4   | 1.8    | -1.3   | 12.8    | 2.5    | 2.7     | 2.5   | 5.0     | 2.3    | -1.1    |
| C06HBa0116O16.1_120641 | -1.1  | 1.1   | -4.1     | -1.6     | -2.0 | -2.6  | 1.2    | -1.0   | 10.6    | 1.5    | 1.1     | -1.3  | 6.0     | -1.4   | -1.3    |
| C01HBa0006K08.1_127343 | -4.7  | -1.5  | -1.2     | 1.1      | 1.8  | 1.2   | -1.8   | -4.5   | 12.0    | -1.0   | -1.4    | -1.2  | 6.4     | -1.0   | -2.6    |
| C08SLe0068N03.1_131153 | -3.9  | -1.0  | -3.8     | 1.7      | 0.0  | -1.2  | -3.7   | -1.2   | 15.2    | -1.3   | -3.5    | -1.4  | 6.8     | -3.5   | -1.1    |
| C08SLe0114E15.1_38488  | -1.1  | -4.6  | -1.4     | 1.3      | -1.6 | -2.7  | -1.2   | -1.8   | 9.2     | -1.4   | -2.5    | -4.9  | 4.8     | -2.5   | -1.5    |
| C07SLm0009N18.2_3030   | -4.1  | -1.1  | -1.1     | 1.0      | 1.4  | -2.1  | 2.6    | -6.5   | 7.5     | -1.2   | 9.7     | 3.1   | 5.2     | -1.9   | 2.3     |
| C08SLe0090D03.1_17474  | -2.6  | -2.5  | 1.4      | -1.6     | -1.5 | -1.4  | 5.4    | 5.1    | 3.8     | 1.5    | 1.8     | 1.2   | 1.0     | 2.7    | 1.8     |
| C12HBa0144B17.1_120378 | -2.9  | -2.7  | 1.4      | -1.6     | -1.4 | -1.3  | 5.3    | 4.9    | 3.8     | 1.6    | 1.8     | 1.2   | 1.0     | 2.7    | 1.8     |
| C04SLm0141K23.1_54841  | -3.0  | -2.5  | 1.3      | -1.5     | -1.6 | -1.4  | 5.6    | 5.4    | 4.0     | 1.6    | 1.8     | 1.2   | 1.1     | 2.8    | 1.9     |
| C08HBa0323O07.1_88692  | -2.7  | -1.7  | 1.3      | -1.4     | -1.0 | -1.2  | 5.3    | 5.5    | 4.1     | 1.7    | 1.9     | 1.5   | 1.1     | 2.9    | 2.3     |
| C06HBa0046P09.1_14651  | -2.7  | -3.3  | 1.5      | -2.0     | -1.6 | -1.3  | 6.0    | 5.7    | 4.3     | 1.7    | 1.9     | 1.3   | 1.2     | 3.0    | 2.0     |
| C06HBa0015I15.1_536    | -2.7  | -3.3  | 1.5      | -2.0     | -1.6 | -1.3  | 6.0    | 5.7    | 4.3     | 1.7    | 1.9     | 1.3   | 1.2     | 3.0    | 2.0     |
| C04HBa0067O19.1_6112   | -5.5  | -2.5  | 1.3      | -1.4     | -1.5 | -1.4  | 5.4    | 5.1    | 3.8     | 1.4    | 1.6     | 1.2   | -1.0    | 2.7    | 1.8     |

|                        |       |      |       |       |      |       |       |       |       |       |       |       |       |       |       |
|------------------------|-------|------|-------|-------|------|-------|-------|-------|-------|-------|-------|-------|-------|-------|-------|
| C05HBa0091D14.1_11542  | -5.3  | -3.8 | 1.7   | -3.4  | -1.2 | -1.3  | 7.8   | 8.3   | 6.0   | 2.0   | 2.2   | 1.8   | 1.3   | 4.2   | 2.9   |
| C04HBa0103J09.1_42370  | -4.1  | -2.1 | 1.7   | -3.1  | -1.5 | -1.2  | 7.3   | 7.1   | 5.3   | 1.8   | 2.0   | 1.3   | 1.1   | 3.6   | 2.4   |
| C03HBa0318C22.1_76957  | -1.9  | -1.5 | 1.4   | -1.6  | -1.0 | 1.2   | 6.2   | 6.1   | 4.6   | 1.7   | 2.0   | -1.1  | -1.7  | 2.0   | 2.1   |
| C07HBa0325D07.1_62352  | -2.5  | -2.0 | 1.4   | -1.6  | -1.2 | 1.2   | 6.0   | 6.0   | 4.5   | 1.6   | 1.9   | -1.2  | -2.0  | 1.9   | 2.0   |
| C04HBa0107N23.1_4597   | -3.8  | -2.5 | 1.4   | -1.8  | -1.3 | 1.2   | 6.7   | 6.8   | 5.0   | 1.6   | 1.9   | -1.4  | -2.5  | 2.0   | 2.1   |
| C08HBa0323O07.1_24299  | -2.9  | -2.5 | 1.4   | -1.7  | -1.3 | 1.1   | 6.3   | 6.4   | 4.8   | 1.6   | 1.9   | -1.3  | -2.4  | 2.0   | 2.1   |
| C09SLm0105D02.1_96970  | -1.8  | -1.2 | 1.4   | -1.7  | 1.1  | 1.3   | 6.6   | 6.6   | 5.0   | 1.8   | 2.2   | 1.0   | -1.5  | 2.2   | 2.4   |
| C04HBa0158A08.1_22367  | -3.3  | -1.9 | 1.5   | -1.8  | 1.2  | 1.2   | 7.4   | 8.4   | 5.9   | 1.8   | 2.0   | -1.1  | -1.9  | 2.4   | 2.6   |
| C08HBa0033P21.1_102690 | 2.3   | -1.5 | 1.5   | -2.0  | 1.0  | -4.8  | 0.0   | 1.6   | 2.2   | 1.3   | 1.6   | 3.7   | -1.7  | -1.2  | -2.0  |
| C06HBa0052N09.1_28071  | -2.8  | -9.1 | -1.4  | 1.3   | -8.1 | -1.7  | 4.1   | 2.0   | 4.4   | 1.7   | 9.9   | 5.1   | 6.2   | 6.8   | -2.3  |
| C11HBa0323C14.1_139784 | -1.4  | 1.3  | -2.8  | -5.9  | -1.4 | -6.7  | 1.3   | 1.9   | 1.3   | 14.9  | 1.5   | 1.3   | 2.2   | 1.2   | -9.3  |
| C08HBa0086C12.1_5634   | -1.1  | 1.1  | -5.0  | 1.3   | 1.5  | 1.4   | 3.8   | 4.1   | 10.7  | 5.8   | 2.9   | 3.1   | 6.7   | 5.1   | 2.6   |
| C08SLm0019J03.1_96646  | -1.1  | 1.1  | -5.0  | 1.3   | 1.5  | 1.4   | 3.8   | 4.1   | 10.5  | 5.8   | 2.9   | 3.1   | 6.6   | 5.1   | 2.6   |
| C06SLe0045F21.1_62802  | -1.2  | 1.2  | -1.8  | -1.3  | 2.1  | 1.8   | 3.5   | 3.0   | 10.9  | 3.8   | 3.5   | 3.5   | 6.7   | 3.4   | 2.5   |
| C06HBa0304P16.1_8244   | -1.2  | 1.2  | -1.8  | -1.3  | 2.1  | 1.8   | 3.5   | 3.0   | 10.9  | 3.8   | 3.5   | 3.5   | 6.7   | 3.4   | 2.5   |
| C07SLm0140K05.1_20295  | -1.4  | 1.3  | -3.3  | -1.6  | -1.2 | -1.7  | 5.8   | 1.0   | 9.1   | 6.2   | 2.1   | 4.3   | 9.8   | 4.3   | 1.5   |
| C04HBa0068N05.1_37863  | -1.7  | 1.2  | -2.0  | 1.5   | 1.4  | -1.2  | 3.7   | 8.6   | 6.6   | 7.5   | 4.8   | 3.7   | 5.7   | 7.4   | 4.6   |
| C09SLm0017K18.2_2329   | 1.4   | -1.7 | -2.1  | -4.4  | -1.5 | 3.8   | 6.0   | 4.9   | 4.4   | 7.9   | 7.4   | 3.5   | 12.5  | 9.5   | 1.2   |
| C01HBa0155M04.1_41815  | -1.0  | 1.0  | -4.1  | -1.4  | 2.0  | 1.4   | 15.8  | 3.0   | 5.6   | 3.2   | 5.7   | 3.5   | 7.0   | 2.8   | -1.7  |
| C09HBa0170H21.1_99572  | -1.3  | 1.3  | -1.8  | 1.3   | 1.0  | 1.5   | 8.7   | 4.4   | 7.6   | 7.7   | 6.1   | 13.3  | 13.7  | 9.6   | 6.0   |
| C06HBa0225A15.1_5238   | -1.6  | 1.4  | -2.6  | 1.3   | -1.0 | 1.4   | 7.6   | 3.9   | 6.6   | 6.6   | 5.3   | 11.4  | 11.6  | 8.3   | 5.2   |
| C05SLm0115G01.3_111365 | -1.8  | 1.5  | -4.4  | 1.3   | -1.2 | -1.0  | 5.7   | 3.0   | 6.6   | 5.7   | 4.3   | 11.0  | 9.1   | 6.7   | 3.9   |
| C01HBa0051C14.1_135746 | -4.2  | 1.8  | -2.1  | -1.2  | 1.2  | -1.0  | 10.7  | 6.9   | 9.2   | 7.7   | 8.0   | 14.2  | 14.0  | 10.5  | 7.2   |
| C04SLm0098C07.1_84445  | -5.8  | 1.8  | 0.0   | 0.0   | -1.0 | -3.2  | 5.0   | 13.4  | 13.7  | 6.7   | 6.5   | 14.4  | 1.9   | 5.2   | -1.7  |
| C02HBa0161P02.1_107887 | -2.3  | 1.4  | 1.4   | -1.5  | 0.0  | -3.5  | 3.1   | 8.1   | 12.0  | 5.1   | 4.0   | 10.0  | 1.5   | 3.5   | -3.7  |
| C07SLm0046H06.1_19884  | -10.7 | 1.7  | -3.5  | 1.7   | 5.3  | -1.3  | 4.2   | 12.1  | 10.1  | 13.4  | 11.4  | 7.8   | 5.2   | -1.9  | 1.4   |
| C01HBa0155M04.1_93171  | -2.5  | -4.0 | 1.2   | -1.3  | 1.1  | 1.5   | 2.1   | -2.4  | 34.1  | 2.6   | 1.6   | 1.4   | 17.2  | 1.8   | -2.0  |
| C12HBa0266F15.1_47176  | 1.0   | -1.0 | 0.0   | 0.0   | 0.0  | -9.1  | 1.7   | 6.2   | 3.2   | 56.7  | 1.5   | 11.9  | 2.0   | -1.1  | 3.5   |
| C02HBa0108N03.2_21605  | 1.7   | -2.9 | 0.0   | 0.0   | 1.5  | -8.5  | 0.0   | 28.3  | -1.7  | 26.3  | -1.6  | -3.1  | 18.7  | -3.2  | -1.5  |
| C06HBa0023D12.1_63482  | 1.3   | -1.3 | -63.5 | -66.6 | -1.1 | -11.0 | -1.7  | 8.2   | -2.6  | 6.4   | -3.2  | -2.2  | -3.1  | -2.1  | -1.4  |
| C07SLm0096B05.1_61107  | -2.5  | 1.6  | 2.2   | 1.2   | -1.7 | -35.8 | -34.8 | -27.5 | -22.7 | -10.2 | -46.0 | -11.8 | -11.5 | -10.5 | 0.0   |
| C02HBa0090O01.2_49940  | -2.4  | 1.6  | 2.4   | 1.1   | -1.6 | -34.9 | -44.8 | -28.4 | -20.9 | -10.8 | -30.2 | -11.5 | -11.1 | -9.7  | 0.0   |
| C08SLm0064E10.1_10518  | -2.4  | 1.6  | 2.4   | 1.1   | -1.6 | -33.1 | -45.0 | -28.6 | -21.0 | -10.9 | -35.4 | -13.0 | -10.6 | -9.7  | 0.0   |
| C08SLm0031I10.1_121471 | -3.2  | 1.7  | 2.3   | 1.2   | -1.5 | -19.2 | -38.5 | -26.1 | -3.8  | -10.1 | -24.2 | -7.9  | -8.1  | -7.3  | 0.0   |
| C07HBa0049C13.2_44916  | -2.9  | 1.7  | 2.2   | 1.1   | -1.5 | -17.6 | -38.7 | -26.2 | -26.4 | -10.1 | -10.4 | -10.2 | -5.6  | -9.2  | 0.0   |
| C09HBa0113I06.1_18795  | -2.6  | 1.6  | 2.2   | 1.2   | -1.5 | -24.6 | -15.7 | -40.0 | -26.9 | -9.0  | -18.5 | -6.6  | -8.3  | -7.5  | 0.0   |
| C11HBa0303G16.1_63707  | -2.8  | 1.6  | 2.1   | 1.1   | -1.6 | -28.6 | -26.7 | -40.7 | -27.4 | -12.2 | -37.8 | -12.3 | -10.8 | -7.6  | 0.0   |
| C01HBa0130I12.1_40414  | -1.8  | 1.4  | 1.7   | -1.1  | -1.8 | -12.1 | -9.2  | -4.9  | -6.5  | -6.2  | -6.0  | -7.8  | -5.3  | -6.9  | 0.0   |
| C06SLe0129O21.1_42844  | -1.8  | 1.4  | 2.9   | 1.6   | -1.4 | -10.4 | -12.6 | -12.8 | -11.6 | -6.1  | -11.8 | -5.9  | -5.9  | -6.6  | -18.8 |
| C04HBa0223O22.1_11322  | -2.5  | 1.6  | 2.3   | 1.1   | -1.6 | -23.6 | -12.4 | -17.1 | -11.5 | -8.7  | -12.4 | -8.7  | -7.4  | -6.4  | -29.2 |
| C07HBa0046G04.1_88999  | -2.2  | 1.5  | 2.2   | 1.0   | -1.6 | -18.2 | -16.6 | -6.8  | -8.8  | -5.7  | -10.2 | -8.5  | -7.8  | -6.4  | -30.8 |
| C08HBa0216M19.1_80302  | -1.8  | 1.4  | 2.3   | 1.0   | -1.7 | -16.6 | -14.9 | -11.6 | -8.4  | -6.0  | -16.5 | -8.7  | -6.2  | -5.6  | -32.7 |
| C07HBa0046G04.1_33876  | -1.2  | 1.1  | 2.5   | -1.4  | -2.3 | -23.5 | -13.1 | -9.8  | -7.8  | -7.2  | -13.3 | -6.9  | -7.4  | -7.4  | -19.1 |
| C06SLm0118M03.1_62516  | -1.2  | 1.2  | 2.4   | -1.5  | -2.3 | -29.5 | -11.6 | -9.8  | -9.3  | -8.6  | -13.9 | -9.6  | -7.3  | -8.9  | -18.0 |
| C11HBa0029C01.2_92878  | -1.6  | 1.4  | 2.6   | -1.1  | -1.9 | -27.4 | -17.4 | -11.6 | -10.2 | -7.8  | -18.1 | -7.3  | -7.4  | -8.4  | -22.9 |
| C05SLe0077B22.1_16612  | -1.5  | 1.3  | 2.5   | -1.1  | -1.9 | -26.3 | -14.6 | -10.6 | -11.7 | -7.1  | -17.2 | -8.8  | -7.1  | -8.3  | -26.7 |
| C06SLe0093P23.1_37922  | -1.3  | 1.2  | 2.6   | -1.0  | -1.9 | -30.2 | -14.3 | -11.8 | -8.6  | -7.7  | -15.5 | -10.6 | -9.3  | -9.2  | -25.1 |

|                        |      |      |     |      |      |        |       |       |       |       |        |       |       |       |        |
|------------------------|------|------|-----|------|------|--------|-------|-------|-------|-------|--------|-------|-------|-------|--------|
| C06HBa0120H21.2_88031  | -1.3 | 1.2  | 2.6 | -1.0 | -1.9 | -30.2  | -14.3 | -11.8 | -8.6  | -7.7  | -15.5  | -10.6 | -9.3  | -9.2  | -25.1  |
| C07HBa0073N22.1_13459  | -3.5 | 1.7  | 1.7 | 1.3  | -1.8 | -29.0  | -8.7  | -26.5 | -10.7 | -6.8  | -49.2  | -6.4  | -9.9  | -7.6  | -18.1  |
| C06HBa0054K13.2_13188  | -2.4 | 1.6  | 2.3 | 1.1  | -1.6 | -18.9  | -19.6 | -10.4 | -12.7 | -7.0  | -31.7  | -7.5  | -7.9  | -7.7  | -15.7  |
| C09HBa0226D21.1_66486  | -1.6 | 1.4  | 2.5 | -1.1 | -2.0 | -32.3  | -23.9 | -15.1 | -12.6 | -9.2  | -28.6  | -9.8  | -8.5  | -9.5  | -15.5  |
| C09HBa0109D11.1_90498  | -1.6 | 1.4  | 2.5 | -1.1 | -2.0 | -32.3  | -23.9 | -15.1 | -12.6 | -9.2  | -28.6  | -9.8  | -8.5  | -9.5  | -15.5  |
| C11HBa0027B05.1_86941  | -3.9 | 1.7  | 1.5 | 1.3  | -1.6 | -24.3  | -8.3  | -14.8 | -10.9 | -6.7  | -12.2  | -11.9 | -6.1  | -7.4  | -50.5  |
| C04HBa0114C15.1_59772  | -1.8 | 1.5  | 2.5 | -1.0 | -1.8 | -22.7  | -18.9 | -15.5 | -6.8  | -7.0  | -15.4  | -10.2 | -7.7  | -8.6  | -51.3  |
| C12HBa0133N05.1_1682   | -1.3 | 1.2  | 2.6 | -1.2 | -2.0 | -24.5  | -14.7 | -15.3 | -10.4 | -6.2  | -15.4  | -8.2  | -6.3  | -8.2  | -41.9  |
| C07SLm0075L20.1_13464  | -1.6 | 1.4  | 2.5 | -1.1 | -1.9 | -30.8  | -13.4 | -17.2 | -9.1  | -7.0  | -13.8  | -7.6  | -7.2  | -8.9  | -44.9  |
| C08SLe0129C18.1_30752  | -1.8 | 1.5  | 2.4 | 1.1  | -1.7 | -18.1  | -22.4 | -18.4 | -15.1 | -9.6  | -22.2  | -11.4 | -9.7  | -8.3  | -34.0  |
| C12HBa0026C13.1_1924   | -1.3 | 1.3  | 2.5 | -1.2 | -1.9 | -22.7  | -21.3 | -12.2 | -10.4 | -8.0  | -19.1  | -9.6  | -7.4  | -8.6  | -32.8  |
| C12HBa0073O10.1_5791   | -1.3 | 1.2  | 2.5 | -1.2 | -1.9 | -25.0  | -21.3 | -12.9 | -10.7 | -8.7  | -21.7  | -10.0 | -8.1  | -8.8  | -35.0  |
| C04SLm0129D14.1_28153  | -1.2 | 1.1  | 2.5 | -1.3 | -1.9 | -29.5  | -20.4 | -19.1 | -4.5  | -9.8  | -23.7  | -10.4 | -5.6  | -8.2  | -32.1  |
| C05SLe0087C17.1_76921  | -2.0 | 1.5  | 2.5 | -1.0 | -1.7 | -28.4  | -19.0 | -17.2 | -11.1 | -8.0  | -20.5  | -9.3  | -8.1  | -9.0  | -28.2  |
| C05SLm0093K24.1_74997  | -1.2 | 1.1  | 2.6 | -1.4 | -2.3 | -31.9  | -19.2 | -16.5 | -10.7 | -8.6  | -21.7  | -9.3  | -8.4  | -9.7  | -35.8  |
| C07HBa0116M01.1_3736   | -1.9 | 1.5  | 2.5 | 1.0  | -1.8 | -27.4  | -32.9 | -19.5 | -12.4 | -9.4  | -20.7  | -9.9  | -8.5  | -7.9  | -44.3  |
| C12HBa0026C13.1_85973  | -2.5 | 1.6  | 2.4 | 1.1  | -1.6 | -22.7  | -32.4 | -16.5 | -16.6 | -9.5  | -19.5  | -11.6 | -8.6  | -6.7  | -49.2  |
| C04SLm0098C07.1_73026  | -1.3 | 1.2  | 2.6 | -1.2 | -2.1 | -28.5  | -29.7 | -19.1 | -12.1 | -9.6  | -36.7  | -10.2 | -9.5  | -9.2  | -48.9  |
| C09HBa0168F14.2_2148   | -1.2 | 1.1  | 2.6 | -1.3 | -2.2 | -25.8  | -30.8 | -20.0 | -14.8 | -10.2 | -43.6  | -12.4 | -9.6  | -10.6 | -54.5  |
| C05HBa0251J13.2_11022  | -1.1 | 1.1  | 2.6 | -1.5 | -2.5 | -52.8  | -29.1 | -23.4 | -14.7 | -10.8 | -29.0  | -13.2 | -10.0 | -11.0 | -42.2  |
| C03HBa0054O21.1_71801  | -1.6 | 1.4  | 2.7 | -1.1 | -1.9 | -40.2  | -22.5 | -15.3 | -12.8 | -8.3  | -30.4  | -8.7  | -7.3  | -7.1  | -39.1  |
| C06SLm0118M03.1_6691   | -1.5 | 1.3  | 2.6 | -1.1 | -2.0 | -39.6  | -37.0 | -22.6 | -13.1 | -9.5  | -28.2  | -10.4 | -9.3  | -9.6  | -42.1  |
| C12HBa0144B17.1_103446 | -2.4 | 1.6  | 2.4 | 1.1  | -1.5 | -30.1  | -32.7 | -21.2 | -18.0 | -11.1 | -30.8  | -10.6 | -9.4  | -9.4  | -39.7  |
| C12HBa0062P09.1_68276  | -2.4 | 1.6  | 2.4 | 1.1  | -1.5 | -30.1  | -32.7 | -21.2 | -18.0 | -11.1 | -30.8  | -10.6 | -9.4  | -9.4  | -39.7  |
| C07HBa0033E17.1_91927  | -1.6 | 1.4  | 2.6 | -1.1 | -1.9 | -46.3  | -52.9 | -31.4 | -16.9 | -12.1 | -41.1  | -12.0 | -10.0 | -10.8 | -321.3 |
| C07SLm0034N13.2_108337 | -1.5 | 1.3  | 2.6 | -1.1 | -1.9 | -49.9  | -61.6 | -26.9 | -18.5 | -12.3 | -69.8  | -13.1 | -10.6 | -11.3 | -320.8 |
| C07HBa0066M15.1_122349 | -1.5 | 1.3  | 2.6 | -1.1 | -2.0 | -51.2  | -63.2 | -28.5 | -17.3 | -12.2 | -65.0  | -13.4 | -10.9 | -11.4 | -328.7 |
| C09HBa0179M08.1_16283  | -1.9 | 1.5  | 2.6 | 1.0  | -1.7 | -39.6  | -34.2 | -28.2 | -19.0 | -11.6 | -46.6  | -12.0 | -10.5 | -9.2  | -385.1 |
| C08HBa0017M21.1_70047  | -1.9 | 1.5  | 2.5 | 1.0  | -1.7 | -41.3  | -44.6 | -25.2 | -16.9 | -11.4 | -60.1  | -12.9 | -10.5 | -9.6  | -386.6 |
| C02HBa0180C05.1_22479  | -1.9 | 1.5  | 2.5 | -1.0 | -1.7 | -43.0  | -49.7 | -28.4 | -17.6 | -11.7 | -60.3  | -12.9 | -10.1 | -10.1 | -387.8 |
| C07HBa0040A11.1_99938  | 1.1  | -1.1 | 2.5 | -1.7 | -2.9 | -96.8  | -68.5 | -39.8 | -22.9 | -18.2 | -129.3 | -17.7 | -13.0 | -16.9 | -221.8 |
| C12HBa0161H10.1_136368 | 1.2  | -1.2 | 2.2 | -2.2 | -3.5 | -118.4 | -61.4 | -43.9 | -14.9 | -20.8 | -137.7 | -20.9 | -12.4 | -18.5 | -159.7 |
| C00HBa0182E16.1_19272  | 1.2  | -1.2 | 2.3 | -2.1 | -3.4 | -124.4 | -64.4 | -43.9 | -27.4 | -21.0 | -162.3 | -20.4 | -14.7 | -18.7 | -194.8 |
| C06HBa0215M16.3_1732   | -1.3 | 1.2  | 2.7 | -1.2 | -2.1 | -59.5  | -65.9 | -33.5 | -17.9 | -13.5 | -55.6  | -13.8 | -10.5 | -12.5 | -242.8 |
| C12HBa0147G13.1_48727  | -1.1 | 1.1  | 2.6 | -1.4 | -2.3 | -67.6  | -62.8 | -33.3 | -18.3 | -14.3 | -77.9  | -14.6 | -11.5 | -13.8 | -272.2 |
| C06SLm0012J12.1_96058  | -1.2 | 1.1  | 2.6 | -1.3 | -2.3 | -63.6  | -51.8 | -32.9 | -19.0 | -14.3 | -91.6  | -13.6 | -10.9 | -13.1 | -224.5 |
| C04HBa0128L09.1_30711  | -1.5 | 1.3  | 2.7 | -1.1 | -1.9 | -50.0  | -39.0 | -27.9 | -16.9 | -11.9 | -58.2  | -12.2 | -10.0 | -11.5 | -214.0 |
| C02SLe0011K05.1_38769  | -1.4 | 1.3  | 2.6 | -1.1 | -2.0 | -53.3  | -55.6 | -29.3 | -18.4 | -12.4 | -54.4  | -12.2 | -10.8 | -11.5 | -225.2 |
| C08SLm0031I10.1_139625 | -1.9 | 1.5  | 2.5 | 1.0  | -1.7 | -39.9  | -49.7 | -21.6 | -17.6 | -10.5 | -38.3  | -12.9 | -10.3 | -9.0  | -96.9  |
| C07HBa0033E17.1_117159 | -1.5 | 1.4  | 2.6 | -1.1 | -1.9 | -36.4  | -29.8 | -19.9 | -13.6 | -9.2  | -36.9  | -11.6 | -9.0  | -8.6  | -107.5 |
| C06HBa0302A23.1_71773  | -1.5 | 1.4  | 2.6 | -1.1 | -1.9 | -31.5  | -37.2 | -28.0 | -15.9 | -11.0 | -50.2  | -11.4 | -8.5  | -10.6 | -107.6 |
| C05SLm0118J18.1_57917  | -1.1 | 1.1  | 2.6 | -1.3 | -2.3 | -46.0  | -38.2 | -26.1 | -15.7 | -12.4 | -43.4  | -12.6 | -10.3 | -12.4 | -113.1 |
| C08HBa0270A17.1_73840  | -2.4 | 1.6  | 2.4 | 1.1  | -1.5 | -14.4  | -17.7 | -10.2 | -12.4 | -7.0  | -24.1  | -10.1 | -8.1  | -8.1  | -99.9  |
| C02SLm0065M14.2_29554  | -2.4 | 1.6  | 2.4 | 1.1  | -1.6 | -22.7  | -20.6 | -13.6 | -13.7 | -9.9  | -23.8  | -9.1  | -7.9  | -9.4  | -98.3  |
| C05SLe0028N03.1_53645  | -2.4 | 1.6  | 2.4 | 1.1  | -1.6 | -24.8  | -45.6 | -23.2 | -15.6 | -10.5 | -23.9  | -11.1 | -10.3 | -7.5  | -98.8  |
| C08HBa0216M19.1_82592  | -2.5 | 1.6  | 2.4 | 1.1  | -1.6 | -26.8  | -33.3 | -23.5 | -19.2 | -8.3  | -23.6  | -11.5 | -9.1  | -8.6  | -86.7  |
| C04HBa0075G11.1_42755  | -1.5 | 1.3  | 2.6 | -1.1 | -1.9 | -34.1  | -41.7 | -22.4 | -15.4 | -11.1 | -25.3  | -11.0 | -10.3 | -9.8  | -81.4  |

|                        |      |      |     |      |      |       |       |       |       |       |       |       |       |       |        |
|------------------------|------|------|-----|------|------|-------|-------|-------|-------|-------|-------|-------|-------|-------|--------|
| C04HBa0178P03.1_12363  | -3.1 | 1.7  | 2.2 | 1.2  | -1.5 | -17.0 | -13.6 | -41.4 | -13.9 | -7.5  | -19.2 | -7.5  | -8.6  | -6.4  | -70.6  |
| C09SLm0143I09.1_21120  | -1.9 | 1.5  | 2.6 | 1.0  | -1.7 | -32.7 | -34.3 | -23.9 | -16.9 | -10.2 | -42.0 | -12.8 | -10.0 | -9.2  | -77.3  |
| C08HBa0239G21.1_113862 | -2.5 | 1.6  | 2.2 | 1.2  | -1.7 | -16.5 | -16.3 | -15.6 | -15.7 | -8.3  | -38.5 | -9.8  | -8.3  | -9.7  | -70.7  |
| C08HBa0028C13.1_59559  | -2.5 | 1.6  | 2.2 | 1.2  | -1.7 | -16.5 | -16.3 | -15.6 | -15.7 | -8.3  | -38.5 | -9.8  | -8.3  | -9.7  | -70.7  |
| C04HBa0078E04.1_60284  | -2.4 | 1.6  | 2.3 | 1.1  | -1.6 | -26.4 | -23.3 | -16.9 | -18.3 | -8.2  | -22.0 | -10.2 | -8.5  | -7.9  | -67.3  |
| C08HBa0069E09.1_103230 | -1.9 | 1.5  | 2.5 | 1.0  | -1.7 | -25.7 | -22.6 | -17.7 | -8.9  | -8.0  | -26.7 | -9.3  | -8.4  | -9.1  | -78.4  |
| C12HBa0161H10.1_74348  | 1.1  | -1.1 | 2.4 | -1.9 | -3.1 | -85.1 | -34.9 | -37.7 | -14.0 | -17.6 | -89.9 | -18.8 | -10.9 | -16.7 | -121.0 |
| C11HBa0323E19.1_90980  | -1.3 | 1.2  | 2.7 | -1.2 | -2.1 | -56.0 | -53.3 | -28.5 | -15.7 | -12.4 | -48.0 | -13.6 | -10.6 | -11.7 | -107.9 |
| C08HBa0060C12.1_158504 | -1.0 | 1.0  | 2.5 | -1.6 | -2.6 | -54.6 | -57.5 | -33.6 | -18.6 | -15.8 | -65.7 | -13.9 | -11.2 | -13.9 | -109.2 |
| C07SLm0046H06.1_12996  | -1.1 | 1.1  | 2.6 | -1.5 | -2.4 | -65.3 | -48.0 | -28.8 | -17.8 | -13.1 | -60.9 | -15.0 | -10.4 | -13.7 | -137.7 |
| C02HBa0044L14.1_40379  | -1.1 | 1.1  | 2.6 | -1.4 | -2.5 | -72.6 | -56.6 | -30.0 | -16.6 | -15.5 | -54.8 | -15.4 | -11.5 | -13.7 | -143.4 |
| C09HBa0135N15.1_83929  | -1.9 | 1.5  | 2.6 | 1.0  | -1.7 | -41.2 | -55.6 | -26.6 | -18.2 | -10.8 | -60.0 | -11.7 | -10.8 | -10.1 | -193.0 |
| C09SLm0104L22.2_19673  | -1.1 | 1.1  | 2.6 | -1.3 | -2.3 | -48.9 | -57.7 | -31.0 | -18.8 | -14.8 | -63.2 | -14.4 | -11.4 | -13.8 | -163.7 |
| C08HBa0197O20.1_111612 | -1.1 | 1.1  | 2.6 | -1.5 | -2.5 | -77.3 | -57.6 | -32.9 | -20.2 | -15.8 | -78.2 | -15.7 | -11.4 | -14.2 | -179.7 |
| C08HBa0165B06.1_25820  | -1.2 | 1.1  | 2.6 | -1.3 | -2.3 | -68.3 | -60.0 | -33.7 | -18.2 | -14.6 | -70.1 | -14.2 | -11.3 | -13.6 | -193.2 |
| C04SLm0033N19.1_46625  | -1.1 | 1.1  | 2.6 | -1.4 | -2.4 | -59.3 | -54.3 | -33.3 | -19.1 | -14.6 | -74.9 | -14.8 | -11.5 | -14.1 | -179.0 |
| C02HBa0198A03.1_11003  | -1.1 | 1.1  | 2.6 | -1.4 | -2.4 | -59.3 | -54.3 | -33.3 | -19.1 | -14.6 | -74.9 | -14.8 | -11.5 | -14.1 | -179.0 |



|             |      |      |      |       |      |      |      |      |      |      |      |      |      |      |      |             |                                                                                                       |
|-------------|------|------|------|-------|------|------|------|------|------|------|------|------|------|------|------|-------------|-------------------------------------------------------------------------------------------------------|
| SGN-E230980 | -1.5 | 1.2  | -1.5 | 0.0   | -1.1 | -1.4 | 0.0  | 1.0  | 6.5  | -1.3 | 0.0  | -1.3 | -1.4 | -2.7 | 13.3 | SGN-U569793 | HB53 (homeobox-8)/ DNA binding / transcription factor                                                 |
| SGN-E244618 | -1.5 | 1.2  | -1.5 | 0.0   | -1.1 | -1.8 | 0.0  | 1.0  | 6.5  | 0.0  | 0.0  | -2.6 | -1.4 | -2.7 | 13.3 | SGN-U569795 | HB53 (homeobox-8)/ DNA binding / transcription factor                                                 |
| SGN-E236433 | -1.8 | 1.1  | -1.7 | -3.6  | -1.3 | -1.4 | -3.3 | -1.1 | 5.6  | -1.0 | 0.0  | -1.5 | -1.6 | -3.2 | 11.8 | SGN-U569793 | HB53 (homeobox-8)/ DNA binding / transcription factor                                                 |
| SGN-E238378 | -1.8 | 1.1  | -1.7 | -3.6  | -1.3 | -1.4 | -3.3 | -1.1 | 5.9  | -3.0 | 0.0  | -1.0 | -1.6 | -3.2 | 11.8 | SGN-U569795 | HB53 (homeobox-8)/ DNA binding / transcription factor                                                 |
| SGN-E231438 | -2.0 | 1.2  | -2.0 | 0.0   | 1.4  | -1.9 | 0.0  | -1.3 | 5.1  | 0.0  | -3.6 | 1.1  | -1.2 | -3.6 | 10.3 | SGN-U569795 | ATHB23 (ARABIDOPSIS THALIANA HOMEBOX PROTEIN 23)/ DNA binding / transcription factor                  |
| SGN-E204494 | -2.0 | 1.2  | -2.0 | 0.0   | 1.4  | -1.9 | 0.0  | -1.3 | 5.1  | 0.0  | -3.6 | 1.1  | -1.2 | -3.6 | 10.3 | SGN-U569795 | ATHB5 (ARABIDOPSIS THALIANA HOMEBOX PROTEIN 5)/ transcription factor                                  |
| SGN-E398011 | -2.0 | 1.2  | -2.0 | 0.0   | 1.4  | -1.9 | 0.0  | -1.3 | 5.1  | 0.0  | -3.6 | 1.1  | -1.2 | -3.6 | 10.3 | SGN-U569795 | ATHB40/HB-5 (ARABIDOPSIS THALIANA HOMEBOX PROTEIN 40)/ DNA binding / transcription factor             |
| SGN-E396656 | -2.0 | 1.2  | -2.0 | 0.0   | 1.4  | -1.6 | 0.0  | -1.3 | 5.1  | 0.0  | -3.6 | 1.1  | -1.2 | -3.6 | 10.3 | SGN-U569795 | ATHB22 (ARABIDOPSIS THALIANA HOMEBOX PROTEIN 22)/ DNA binding / transcription factor                  |
| SGN-E326542 | -2.0 | 1.2  | -2.0 | 0.0   | 1.4  | -1.6 | 0.0  | -1.3 | 5.1  | 0.0  | -3.6 | 1.1  | -1.2 | -3.6 | 10.3 | SGN-U569795 | HB53 (homeobox-8)/ DNA binding / transcription factor                                                 |
| SGN-E322234 | -2.0 | -1.1 | -2.0 | -2.1  | -1.4 | -1.6 | -3.8 | -1.3 | 5.2  | -3.5 | 0.0  | -1.2 | -1.8 | -3.6 | 10.4 | SGN-U569795 | HB53 (homeobox-8)/ DNA binding / transcription factor                                                 |
| SGN-E241891 | -2.5 | -1.0 | -2.5 | -2.6  | -1.2 | -2.0 | -4.7 | -1.6 | 3.9  | -1.4 | 0.0  | -2.2 | -2.2 | -4.5 | 8.3  | SGN-U569793 | HB53 (homeobox-8)/ DNA binding / transcription factor                                                 |
| SGN-E377567 | -2.8 | -1.1 | -2.7 | -1.9  | -1.3 | -1.9 | -5.2 | -1.8 | 3.6  | -4.8 | 0.0  | -4.8 | -2.5 | -4.9 | 7.6  | SGN-U569793 | HB53 (homeobox-8)/ DNA binding / transcription factor                                                 |
| SGN-E396917 | -2.8 | -1.1 | -2.7 | -1.9  | -1.3 | -2.2 | -5.2 | -1.8 | 3.6  | -4.8 | 0.0  | -4.8 | -2.5 | -4.9 | 7.6  | SGN-U569793 | HB53 (homeobox-8)/ DNA binding / transcription factor                                                 |
| SGN-E254986 | 1.0  | 1.0  | 0.0  | -3.3  | 2.0  | 0.0  | -1.0 | 1.1  | 6.7  | 2.5  | 1.4  | -1.2 | -8.5 | -1.2 | -3.9 | SGN-U583356 | CBL5 (CALCINEURIN B-LIKE PROTEIN 5)                                                                   |
| SGN-E252889 | 0.0  | 0.0  | 0.0  | 0.0   | 0.0  | -8.1 | -1.1 | 4.9  | 4.2  | 2.9  | 3.1  | 5.7  | 1.3  | -2.1 | 0.0  | SGN-U586401 | similar to unknown [A. thaliana] (TAIR:AT4G24530.1)/ similar to unnamed [V. vinifera] (GB:CAO61608.1) |
| SGN-E544003 | 0.0  | 0.0  | 0.0  | 0.0   | 0.0  | -8.1 | -1.6 | 0.0  | 0.0  | 0.0  | 3.1  | 0.0  | -6.1 | -6.2 | 0.0  | SGN-U582046 | ATCHX27 (cation/hydrogen exchanger 27)/ monovalent cation:proton antiporter                           |
| SGN-E206578 | 0.0  | 0.0  | 0.0  | 0.0   | 0.0  | -4.0 | 0.0  | -6.6 | 0.0  | 0.0  | 0.0  | 0.0  | 0.0  | 7.0  | 0.0  | SGN-U581452 | PAL (PHENYL ALANINE AMMONIA-LYASE)/ phenylalanine ammonia-lyase                                       |
| SGN-E341777 | 0.0  | 0.0  | 0.0  | 0.0   | -2.5 | -4.0 | -3.2 | -1.6 | -1.3 | -6.0 | 1.6  | 0.0  | -3.1 | 1.1  | 1.1  | SGN-U578285 | similar to unknown protein [A.thaliana] (TAIR:AT1G72510.1)                                            |
| SGN-E733270 | -1.2 | 1.2  | 0.0  | -17.3 | 1.2  | -4.9 | 4.7  | 3.7  | 5.0  | 1.7  | 2.9  | 7.7  | 5.8  | 8.5  | 4.0  | SGN-U579800 | VTC5/ galactose-1-phosphate guanylyltransferase (GDP)                                                 |
| SGN-E288004 | -1.2 | 1.2  | 0.0  | -17.3 | 1.1  | -4.9 | 4.6  | 3.7  | 5.0  | 1.7  | 2.9  | 7.7  | 5.8  | 8.5  | 4.0  | SGN-U579800 | VTC5/ galactose-1-phosphate guanylyltransferase (GDP)                                                 |
| SGN-E231778 | -1.2 | 1.2  | 0.0  | -17.3 | 1.1  | -4.9 | 4.8  | 3.7  | 5.0  | 1.7  | 2.9  | 7.6  | 5.6  | 8.8  | 4.0  | SGN-U579800 | VTC5/ galactose-1-phosphate guanylyltransferase (GDP)                                                 |
| SGN-E338078 | -1.2 | 1.2  | 0.0  | -17.3 | 1.1  | -4.9 | 4.8  | 3.7  | 5.0  | 1.7  | 2.9  | 7.6  | 5.6  | 8.7  | 4.0  | SGN-U579800 | VTC5/ galactose-1-phosphate guanylyltransferase (GDP)                                                 |
| SGN-E353609 | -1.2 | 1.2  | 0.0  | -17.3 | 1.0  | -4.9 | 4.4  | 3.6  | 4.9  | 1.8  | 2.9  | 7.6  | 5.8  | 8.2  | 4.0  | SGN-U579800 | No gene description                                                                                   |
| SGN-E352537 | -1.2 | 1.2  | 0.0  | -17.3 | 1.0  | -4.9 | 4.4  | 3.6  | 4.9  | 1.8  | 2.9  | 7.6  | 5.8  | 8.2  | 4.0  | SGN-U579800 | No gene description                                                                                   |
| SGN-E370454 | -1.3 | 1.2  | 0.0  | -18.3 | 1.1  | -4.6 | 4.6  | 3.5  | 4.9  | 1.8  | 2.7  | 7.3  | 5.6  | 8.6  | 3.9  | SGN-U579800 | VTC2 (VITAMIN C DEFECTIVE 2)                                                                          |
| SGN-E317957 | -1.3 | 1.2  | 0.0  | -18.3 | 1.1  | -4.6 | 4.6  | 3.5  | 4.9  | 1.8  | 2.7  | 7.3  | 5.6  | 8.6  | 3.9  | SGN-U579800 | VTC2 (VITAMIN C DEFECTIVE 2)                                                                          |
| SGN-E713361 | -1.3 | 1.2  | 0.0  | -18.3 | 1.1  | -4.6 | 4.6  | 3.5  | 4.9  | 1.8  | 2.7  | 7.3  | 5.6  | 8.6  | 3.9  | SGN-U579800 | VTC2 (VITAMIN C DEFECTIVE 2)                                                                          |
| SGN-E350235 | -1.3 | 1.2  | 0.0  | -18.3 | 1.1  | -5.2 | 4.5  | 3.5  | 4.7  | 1.8  | 2.7  | 7.3  | 5.4  | 8.4  | 3.8  | SGN-U579800 | VTC5/ galactose-1-phosphate guanylyltransferase (GDP)                                                 |
| SGN-E206238 | -1.2 | 1.2  | 0.0  | -17.3 | 1.2  | -4.4 | 4.8  | 3.7  | 5.1  | 1.9  | 2.9  | 7.6  | 5.8  | 9.0  | 4.0  | SGN-U579800 | VTC2 (VITAMIN C DEFECTIVE 2)                                                                          |
| SGN-E288385 | -1.2 | 1.2  | 0.0  | -17.3 | 1.1  | -4.4 | 4.5  | 3.7  | 5.0  | 1.9  | 2.9  | 7.6  | 5.8  | 8.6  | 4.0  | SGN-U579800 | VTC5/ galactose-1-phosphate guanylyltransferase (GDP)                                                 |
| SGN-E209658 | -1.0 | 1.2  | 0.0  | -17.3 | 1.0  | -4.4 | 4.9  | 3.4  | 5.4  | 1.8  | 3.0  | 7.7  | 5.8  | 9.2  | 4.2  | SGN-U579800 | VTC2 (VITAMIN C DEFECTIVE 2)                                                                          |
| SGN-E334284 | -1.0 | 1.2  | 0.0  | -17.3 | 1.1  | -3.6 | 4.9  | 3.6  | 5.4  | 1.9  | 3.1  | 7.8  | 5.9  | 9.4  | 4.3  | SGN-U579800 | VTC2 (VITAMIN C DEFECTIVE 2)                                                                          |
| SGN-E351643 | -1.1 | 1.2  | 0.0  | -16.2 | 1.1  | -4.6 | 5.1  | 4.0  | 5.3  | 2.0  | 3.1  | 8.1  | 6.1  | 9.3  | 4.2  | SGN-U579800 | VTC5/ galactose-1-phosphate guanylyltransferase (GDP)                                                 |
| SGN-E219946 | -1.1 | 1.2  | 0.0  | -16.2 | 1.2  | -4.6 | 5.0  | 3.9  | 5.2  | 1.8  | 3.1  | 8.1  | 6.0  | 9.0  | 4.3  | SGN-U579800 | VTC5/ galactose-1-phosphate guanylyltransferase (GDP)                                                 |
| SGN-E710048 | 1.0  | 1.2  | 0.0  | -18.3 | 1.2  | -3.5 | 4.7  | 3.4  | 5.2  | 1.8  | 2.9  | 7.4  | 5.6  | 8.8  | 4.1  | SGN-U579800 | VTC5/ galactose-1-phosphate guanylyltransferase (GDP)                                                 |
| SGN-E706831 | 1.0  | 1.2  | 0.0  | -18.3 | 1.2  | -3.5 | 4.7  | 3.5  | 5.3  | 1.8  | 2.9  | 7.3  | 5.5  | 8.8  | 4.1  | SGN-U579800 | VTC5/ galactose-1-phosphate guanylyltransferase (GDP)                                                 |
| SGN-E698153 | 1.0  | 1.2  | 0.0  | -18.3 | 1.2  | -3.8 | 4.7  | 3.4  | 5.2  | 1.8  | 2.9  | 7.3  | 5.5  | 8.7  | 4.0  | SGN-U579800 | VTC5/ galactose-1-phosphate guanylyltransferase (GDP)                                                 |
| SGN-E332718 | -1.1 | 1.2  | 0.0  | -18.3 | 1.0  | -3.5 | 4.7  | 3.4  | 5.2  | 1.8  | 2.9  | 7.4  | 5.5  | 8.7  | 4.0  | SGN-U579800 | VTC5/ galactose-1-phosphate guanylyltransferase (GDP)                                                 |
| SGN-E334413 | -1.1 | 1.2  | 0.0  | -18.3 | 1.0  | -3.8 | 4.6  | 3.5  | 5.1  | 1.8  | 3.0  | 7.3  | 5.6  | 8.8  | 4.1  | SGN-U579800 | VTC2 (VITAMIN C DEFECTIVE 2)                                                                          |
| SGN-E728545 | -1.0 | 1.2  | 0.0  | -19.4 | 1.0  | -3.2 | 4.4  | 3.5  | 4.9  | 1.8  | 2.8  | 7.0  | 5.3  | 8.3  | 3.9  | SGN-U579800 | VTC5/ galactose-1-phosphate guanylyltransferase (GDP)                                                 |
| SGN-E738314 | -1.2 | 1.2  | 0.0  | -20.4 | 1.1  | -3.6 | 4.2  | 3.3  | 4.7  | 1.7  | 2.7  | 6.6  | 5.0  | 8.0  | 3.7  | SGN-U579800 | VTC5/ galactose-1-phosphate guanylyltransferase (GDP)                                                 |
| SGN-E735691 | -1.2 | 1.2  | 0.0  | -20.4 | 1.1  | -3.6 | 4.2  | 3.3  | 4.7  | 1.7  | 2.7  | 6.6  | 5.0  | 8.0  | 3.7  | SGN-U579800 | VTC5/ galactose-1-phosphate guanylyltransferase (GDP)                                                 |
| SGN-E738531 | -1.2 | 1.2  | 0.0  | -20.4 | 1.1  | -3.6 | 4.2  | 3.3  | 4.7  | 1.7  | 2.7  | 6.6  | 5.0  | 8.0  | 3.7  | SGN-U579800 | VTC5/ galactose-1-phosphate guanylyltransferase (GDP)                                                 |
| SGN-E740723 | -1.2 | 1.2  | 0.0  | -20.4 | 1.1  | -4.2 | 4.1  | 3.2  | 4.6  | 1.7  | 2.7  | 6.6  | 5.1  | 8.0  | 3.7  | SGN-U579800 | VTC5/ galactose-1-phosphate guanylyltransferase (GDP)                                                 |
| SGN-E739612 | -1.2 | 1.2  | 0.0  | -20.4 | -1.0 | -4.2 | 4.1  | 3.3  | 4.6  | 1.6  | 2.7  | 6.5  | 5.0  | 7.8  | 3.7  | SGN-U579800 | VTC5/ galactose-1-phosphate guanylyltransferase (GDP)                                                 |
| SGN-E737197 | -1.2 | 1.2  | 0.0  | -20.4 | -1.0 | -4.2 | 4.1  | 3.2  | 4.6  | 1.6  | 2.7  | 6.5  | 5.0  | 7.8  | 3.7  | SGN-U579800 | VTC5/ galactose-1-phosphate guanylyltransferase (GDP)                                                 |
| SGN-E340803 | -1.2 | 1.2  | 0.0  | -19.4 | -1.0 | -4.4 | 4.4  | 3.3  | 4.8  | 1.7  | 2.6  | 6.8  | 5.3  | 8.2  | 3.9  | SGN-U579800 | VTC2 (VITAMIN C DEFECTIVE 2)                                                                          |
| SGN-E734179 | -1.2 | 1.2  | -8.2 | -17.3 | 1.0  | -4.9 | 4.4  | 3.6  | 4.9  | 1.8  | 2.9  | 7.7  | 5.8  | 8.4  | 4.0  | SGN-U579800 | No gene description                                                                                   |
| SGN-E705284 | -1.0 | 1.2  | 0.0  | -9.4  | 1.2  | -3.6 | 4.6  | 3.4  | 5.2  | 1.8  | 2.8  | 7.2  | 5.5  | 8.7  | 4.0  | SGN-U579800 | VTC5/ galactose-1-phosphate guanylyltransferase (GDP)                                                 |
| SGN-E703715 | -1.0 | 1.2  | 0.0  | -9.4  | 1.2  | -3.6 | 4.6  | 3.4  | 5.2  | 1.8  | 2.8  | 7.2  | 5.5  | 8.7  | 4.0  | SGN-U579800 | VTC5/ galactose-1-phosphate guanylyltransferase (GDP)                                                 |
| SGN-E705085 | -1.0 | 1.2  | 0.0  | -9.4  | 1.2  | -3.6 | 4.6  | 3.4  | 5.2  | 1.8  | 2.8  | 7.2  | 5.4  | 8.6  | 4.0  | SGN-U579800 | VTC5/ galactose-1-phosphate guanylyltransferase (GDP)                                                 |
| SGN-E733652 | -1.2 | 1.2  | 0.0  | -8.9  | 1.1  | -4.5 | 4.7  | 3.6  | 5.0  | 1.8  | 2.8  | 7.4  | 5.7  | 8.7  | 3.9  | SGN-U579800 | VTC2 (VITAMIN C DEFECTIVE 2)                                                                          |
| SGN-E739776 | -1.3 | 1.2  | 0.0  | -11.0 | -1.0 | -4.5 | 3.8  | 3.0  | 4.3  | 1.5  | 2.5  | 6.0  | 4.8  | 7.3  | 3.5  | SGN-U579800 | VTC5/ galactose-1-phosphate guanylyltransferase (GDP)                                                 |
| SGN-E219802 | 1.0  | 1.2  | 0.0  | -14.1 | -1.1 | -4.0 | 5.4  | 4.0  | 5.9  | 2.0  | 3.5  | 9.3  | 6.9  | 9.8  | 4.7  | SGN-U579800 | No gene description                                                                                   |
| SGN-E268810 | -1.1 | 1.2  | 0.0  | -15.2 | 1.1  | -3.8 | 5.6  | 4.0  | 6.0  | 2.1  | 3.2  | 8.7  | 6.7  | 10.1 | 4.5  | SGN-U579800 | VTC2 (VITAMIN C DEFECTIVE 2)                                                                          |

|             |      |      |      |       |      |       |      |      |      |      |      |      |      |      |       |             |                                                                                          |
|-------------|------|------|------|-------|------|-------|------|------|------|------|------|------|------|------|-------|-------------|------------------------------------------------------------------------------------------|
| SGN-E254110 | -1.1 | 1.2  | 0.0  | -12.0 | -1.8 | -2.5  | 3.5  | 3.6  | 2.5  | 3.7  | 7.8  | 5.2  | 3.1  | 3.2  | 3.3   | SGN-U578664 | No gene description                                                                      |
| SGN-E262182 | -1.1 | 1.2  | 0.0  | -12.1 | -1.8 | -2.5  | 3.5  | 3.6  | 2.5  | 3.7  | 7.7  | 5.1  | 3.1  | 3.2  | 3.2   | SGN-U578664 | No gene description                                                                      |
| SGN-E244444 | -4.8 | 1.2  | 0.0  | -9.9  | -3.4 | -2.3  | 2.2  | 1.1  | 2.2  | 1.6  | 1.1  | -2.8 | 2.6  | 6.6  | 2.4   | SGN-U580215 | DELTA-VPE (delta vacuolar processing enzyme)/ cysteine-type endopeptidase                |
| SGN-E715887 | -5.8 | 1.2  | 0.0  | -12.0 | -4.2 | -2.1  | 1.8  | -1.1 | 1.8  | 1.3  | 1.1  | -2.0 | 2.6  | 6.0  | 2.0   | SGN-U580215 | DELTA-VPE (delta vacuolar processing enzyme)/ cysteine-type endopeptidase                |
| SGN-E713189 | 0.0  | 1.2  | 0.0  | -12.0 | -4.2 | -2.3  | 1.8  | -1.0 | 1.9  | 1.3  | -1.1 | -3.4 | 2.4  | 5.9  | 1.9   | SGN-U580215 | DELTA-VPE (delta vacuolar processing enzyme)/ cysteine-type endopeptidase                |
| SGN-E716212 | 0.0  | 1.2  | 0.0  | -12.0 | -4.2 | -2.3  | 1.8  | -1.0 | 1.9  | 1.2  | -1.1 | -3.4 | 2.4  | 5.9  | 1.9   | SGN-U580215 | DELTA-VPE (delta vacuolar processing enzyme)/ cysteine-type endopeptidase                |
| SGN-E390928 | 2.0  | -1.5 | 0.0  | -7.7  | -5.4 | -3.5  | -1.6 | -3.6 | -2.1 | -1.3 | -1.7 | -1.4 | -1.9 | 13.5 | 1.1   | SGN-U577055 | CYP79F1 (SUPERSHOOT 1)                                                                   |
| SGN-E390927 | 2.0  | -1.5 | 0.0  | -7.7  | -5.4 | -3.5  | -2.0 | -3.6 | -2.1 | -1.4 | -1.9 | -1.6 | -2.2 | 13.5 | 1.1   | SGN-U577055 | CYP705A27 (cytochrome P450/2C family 705/2C subfamily A/2C polypeptide 27)               |
| SGN-E554047 | 0.0  | 1.2  | 0.0  | 0.0   | 1.4  | 2.9   | 16.7 | 2.1  | 3.1  | 11.4 | 7.8  | 1.1  | 18.8 | 6.6  | 14.5  | SGN-U580226 | BETA-VPE (vacuolar processing enzyme beta)/ cysteine-type endopeptidase                  |
| SGN-E539916 | 0.0  | 0.0  | 0.0  | 0.0   | 0.0  | 3.6   | 18.7 | -6.6 | 0.0  | 1.0  | -2.0 | -6.0 | 21.5 | -3.1 | 16.4  | SGN-U571087 | No gene description                                                                      |
| SGN-E288193 | 0.0  | 0.0  | 0.0  | 0.0   | 0.0  | 3.6   | 18.7 | -6.6 | 0.0  | 1.0  | -2.0 | -6.0 | 21.5 | -3.1 | 16.4  | SGN-U571087 | No gene description                                                                      |
| SGN-E346063 | 0.0  | -1.2 | 0.0  | -1.5  | 1.9  | 2.8   | 16.3 | 0.0  | 2.8  | 2.3  | 0.0  | 0.0  | 0.0  | 3.7  | 18.0  | SGN-U567550 | BAN (BANYULS)                                                                            |
| SGN-E322420 | -1.5 | 1.2  | 0.0  | 0.0   | 1.4  | -1.8  | 6.3  | 6.9  | 7.8  | 8.4  | 9.6  | 5.7  | 5.5  | 8.1  | 2.8   | SGN-U573856 | CYP86C3 (cytochrome P450/2C family 86/2C subfamily C/2C polypeptide 3)/ oxygen binding   |
| SGN-E321043 | -1.5 | 1.2  | 0.0  | 0.0   | 1.4  | -1.8  | 6.3  | 6.9  | 7.8  | 8.4  | 9.6  | 5.7  | 5.5  | 8.1  | 2.8   | SGN-U573856 | CYP96A11 (cytochrome P450/2C family 96/2C subfamily A/2C polypeptide 11)/ oxygen binding |
| SGN-E323332 | -1.5 | 1.2  | 0.0  | 0.0   | 1.4  | -1.8  | 6.3  | 6.9  | 7.8  | 8.4  | 9.6  | 5.7  | 5.5  | 8.1  | 2.8   | SGN-U573856 | CYP86C3 (cytochrome P450/2C family 86/2C subfamily C/2C polypeptide 3)/ oxygen binding   |
| SGN-E325318 | -1.5 | 1.2  | 0.0  | 0.0   | 1.4  | -1.8  | 6.3  | 6.9  | 7.8  | 8.4  | 9.6  | 5.7  | 5.5  | 8.1  | 2.8   | SGN-U573856 | CYP86C3 (cytochrome P450/2C family 86/2C subfamily C/2C polypeptide 3)/ oxygen binding   |
| SGN-E325837 | -1.5 | 1.2  | 0.0  | 0.0   | 1.4  | -1.8  | 5.9  | 6.9  | 7.5  | 8.7  | 9.6  | 5.7  | 5.5  | 8.1  | 2.8   | SGN-U573856 | CYP86C4 (cytochrome P450/2C family 86/2C subfamily C/2C polypeptide 4)/ oxygen binding   |
| SGN-E323122 | -1.5 | 1.2  | 0.0  | 0.0   | 1.4  | -2.4  | 6.3  | 6.9  | 7.8  | 8.4  | 9.6  | 5.7  | 5.5  | 7.7  | 2.4   | SGN-U573856 | CYP86C3 (cytochrome P450/2C family 86/2C subfamily C/2C polypeptide 3)/ oxygen binding   |
| SGN-E278518 | 0.0  | 1.2  | 0.0  | 0.0   | 4.1  | 1.7   | 8.4  | 9.3  | 3.1  | 12.5 | 14.4 | 5.7  | 6.6  | 6.6  | 1.2   | SGN-U579752 | No gene description                                                                      |
| SGN-E334385 | 0.0  | 1.2  | 0.0  | 0.0   | 0.0  | -2.4  | 1.6  | 2.6  | 6.6  | 19.4 | 5.5  | 4.0  | 3.3  | 3.3  | 1.2   | SGN-U563291 | No gene description                                                                      |
| SGN-E311195 | 1.3  | -1.2 | 0.0  | -1.5  | 0.0  | 2.8   | 3.5  | 4.9  | 5.5  | 4.6  | 15.0 | 3.1  | 3.0  | 2.2  | 1.6   | SGN-U569493 | No gene description                                                                      |
| SGN-E300181 | 1.3  | -1.2 | 0.0  | -1.5  | 0.0  | 2.8   | 3.5  | 4.9  | 5.5  | 4.6  | 15.0 | 3.1  | 3.0  | 2.2  | 1.6   | SGN-U569493 | No gene description                                                                      |
| SGN-E311810 | 1.3  | -1.2 | 0.0  | -1.5  | 0.0  | 2.8   | 3.5  | 4.9  | 5.5  | 4.6  | 15.0 | 3.1  | 3.0  | 2.2  | 1.6   | SGN-U569493 | No gene description                                                                      |
| SGN-E303822 | 2.0  | 1.2  | 0.0  | 0.0   | 0.0  | -1.2  | 5.2  | 5.1  | 8.2  | 4.6  | 16.6 | 3.4  | 3.3  | 3.3  | 0.0   | SGN-U569493 | No gene description                                                                      |
| SGN-E305856 | 2.0  | 0.0  | 0.0  | -1.0  | 0.0  | 1.3   | 5.3  | 3.1  | 8.3  | 3.5  | 16.9 | 3.5  | 3.4  | 3.4  | 0.0   | SGN-U569493 | No gene description                                                                      |
| SGN-E242734 | 0.0  | -1.6 | 0.0  | -1.0  | 0.0  | 1.7   | 0.0  | 0.0  | 1.6  | 5.8  | 19.3 | 0.0  | 0.0  | -1.8 | -1.6  | SGN-U602836 | tRNA-splicing endonuclease positive effector-related                                     |
| SGN-E204785 | 2.0  | 0.0  | 0.0  | 0.0   | 1.4  | 3.0   | 7.5  | 6.3  | 9.3  | 15.1 | 16.9 | 8.1  | 10.1 | 4.5  | 3.7   | SGN-U573010 | UGE3 (UDP-D-GLUCOSE/UDP-D-GALACTOSE 4-EPIMERASE 3)                                       |
| SGN-E355200 | 0.0  | 1.2  | 0.0  | 0.0   | 1.4  | 2.9   | 2.1  | 9.3  | 14.3 | 17.1 | 24.4 | 3.4  | 5.5  | 3.3  | 1.2   | SGN-U577965 | No gene description                                                                      |
| SGN-E335305 | 0.0  | 1.2  | 0.0  | 0.0   | 1.8  | -2.4  | 9.1  | -2.9 | 0.0  | 28.9 | 1.1  | 1.5  | -1.4 | 0.0  | -1.2  | SGN-U589947 | No gene description                                                                      |
| SGN-E706599 | 2.0  | 1.1  | 0.0  | -14.4 | -2.0 | -16.4 | 9.7  | 9.3  | 17.4 | 9.4  | 10.2 | 18.4 | 1.6  | 1.9  | -11.4 | SGN-U577849 | chloroplast outer membrane protein/2C putative                                           |
| SGN-E351528 | 0.0  | 1.2  | 0.0  | 0.0   | -2.5 | 3.4   | 15.4 | 15.1 | 13.0 | 7.0  | 12.7 | 10.4 | 12.3 | 10.1 | 9.7   | SGN-U567805 | Encodes a Wound-induced protein (WIP) family protein                                     |
| SGN-E351377 | 0.0  | 1.2  | 0.0  | 0.0   | -2.5 | 3.4   | 15.4 | 15.1 | 13.0 | 7.0  | 12.7 | 10.4 | 12.3 | 10.1 | 9.7   | SGN-U567805 | Encodes a Wound-induced protein (WIP) family protein                                     |
| SGN-E357643 | 0.0  | 1.2  | 0.0  | 0.0   | -2.5 | 3.4   | 15.4 | 15.1 | 13.0 | 7.0  | 12.5 | 10.4 | 12.3 | 10.1 | 9.7   | SGN-U567805 | Encodes a Wound-induced protein (WIP) family protein                                     |
| SGN-E396950 | 0.0  | 1.2  | 0.0  | 0.0   | -2.5 | 3.4   | 15.4 | 15.1 | 13.1 | 7.0  | 12.7 | 10.4 | 12.3 | 10.1 | 9.5   | SGN-U567805 | Encodes a Wound-induced protein (WIP) family protein                                     |
| SGN-E356594 | 0.0  | 1.2  | 0.0  | 0.0   | -2.5 | 3.4   | 15.3 | 15.1 | 13.1 | 7.0  | 12.5 | 10.4 | 12.3 | 10.1 | 9.5   | SGN-U567805 | Encodes a Wound-induced protein (WIP) family protein                                     |
| SGN-E720573 | 0.0  | 1.2  | 0.0  | 0.0   | -2.5 | 3.4   | 15.5 | 15.1 | 13.3 | 7.0  | 12.5 | 10.4 | 12.5 | 10.4 | 9.7   | SGN-U567805 | ATHCHIB (BASIC CHITINASE)/ chitinase                                                     |
| SGN-E717440 | 0.0  | 1.2  | 0.0  | 0.0   | -2.5 | 3.4   | 15.4 | 15.1 | 13.3 | 7.0  | 12.5 | 10.4 | 12.5 | 10.1 | 9.7   | SGN-U567805 | ATHCHIB (BASIC CHITINASE)/ chitinase                                                     |
| SGN-E351410 | 0.0  | 0.0  | 0.0  | 0.0   | 0.0  | 3.5   | 14.2 | 15.2 | 12.2 | 7.2  | 11.9 | 9.4  | 11.6 | 9.1  | 8.9   | SGN-U567805 | Encodes a Wound-induced protein (WIP) family protein                                     |
| SGN-E304228 | 0.0  | 1.2  | 0.0  | 0.0   | -1.9 | 3.0   | 13.5 | 13.2 | 11.6 | 6.1  | 11.0 | 9.1  | 10.9 | 8.8  | 8.3   | SGN-U567805 | ATHCHIB (BASIC CHITINASE)/ chitinase                                                     |
| SGN-E353135 | 0.0  | 1.2  | 0.0  | 0.0   | -3.3 | 2.7   | 12.8 | 12.5 | 10.7 | 6.1  | 10.4 | 8.2  | 10.1 | 8.3  | 7.5   | SGN-U567805 | Encodes a Wound-induced protein (WIP) family protein                                     |
| SGN-E376537 | 0.0  | 1.1  | 0.0  | -4.2  | -1.9 | 3.0   | 13.4 | 13.3 | 11.6 | 6.2  | 11.0 | 9.3  | 10.9 | 9.0  | 8.3   | SGN-U567805 | Encodes a Wound-induced protein (WIP) family protein                                     |
| SGN-E744742 | -4.1 | 1.2  | -4.0 | 0.0   | -1.9 | 2.9   | 13.1 | 13.2 | 11.2 | 6.1  | 10.8 | 8.9  | 10.7 | 8.4  | 8.3   | SGN-U567805 | Encodes a Wound-induced protein (WIP) family protein                                     |
| SGN-E297141 | 0.0  | 1.2  | 0.0  | 0.0   | -2.2 | 4.0   | 18.0 | 17.7 | 15.5 | 8.2  | 14.6 | 12.1 | 14.6 | 11.8 | 11.1  | SGN-U567805 | ATHCHIB (BASIC CHITINASE)/ chitinase                                                     |
| SGN-E351482 | 0.0  | 1.2  | 0.0  | 0.0   | -4.4 | 3.9   | 17.6 | 17.5 | 15.1 | 8.0  | 14.6 | 12.1 | 14.4 | 11.6 | 11.3  | SGN-U567805 | Encodes a Wound-induced protein (WIP) family protein                                     |
| SGN-E744907 | 0.0  | 1.2  | 0.0  | 0.0   | -1.8 | 4.8   | 20.9 | 21.0 | 18.4 | 9.8  | 17.5 | 14.5 | 17.0 | 13.9 | 13.3  | SGN-U567805 | Encodes a Wound-induced protein (WIP) family protein                                     |
| SGN-E372004 | 2.0  | -1.6 | 0.0  | 0.0   | 4.9  | 3.0   | 15.4 | 16.2 | 10.9 | 20.9 | 6.8  | 12.1 | 23.6 | 14.6 | 10.4  | SGN-U568037 | catalytic                                                                                |
| SGN-E287121 | 2.0  | -1.6 | 0.0  | 0.0   | 4.9  | 3.0   | 15.4 | 16.2 | 10.9 | 20.9 | 6.8  | 12.1 | 23.6 | 14.6 | 10.4  | SGN-U568037 | catalytic                                                                                |
| SGN-E337845 | 2.0  | 0.0  | 0.0  | 1.9   | 4.2  | -1.2  | 9.6  | 12.6 | 8.3  | 10.4 | 7.9  | 16.2 | 7.9  | 21.3 | 20.9  | SGN-U577627 | RHA1                                                                                     |
| SGN-E278955 | 2.0  | 0.0  | 0.0  | 1.9   | 4.2  | -1.2  | 9.6  | 12.6 | 8.3  | 10.4 | 7.9  | 16.2 | 7.9  | 21.3 | 20.9  | SGN-U577627 | RHA1                                                                                     |
| SGN-E397078 | 2.0  | 0.0  | 0.0  | 1.9   | 4.2  | -1.2  | 9.6  | 12.6 | 8.3  | 10.4 | 7.9  | 16.2 | 7.9  | 21.3 | 20.9  | SGN-U577627 | AtRABG3d (Arabidopsis Rab GTPase homolog G3d)/ GTP binding                               |
| SGN-E378032 | 1.4  | 0.0  | 0.0  | 2.0   | 2.9  | -1.1  | 6.6  | 8.6  | 5.7  | 7.2  | 5.4  | 11.1 | 5.4  | 14.7 | 14.4  | SGN-U577627 | AtRABH1c (Arabidopsis Rab GTPase homolog H1c)/ GTP binding                               |
| SGN-E317484 | 0.0  | 0.0  | 0.0  | 0.0   | 0.0  | -8.1  | 30.8 | 30.0 | 26.6 | 26.2 | 12.9 | 2.0  | 2.6  | 16.7 | -5.6  | SGN-U600578 | No gene description                                                                      |
| SGN-E709466 | -1.2 | -1.3 | 0.0  | -1.3  | 1.1  | 1.2   | -1.6 | -2.4 | -1.6 | -4.3 | -2.2 | -4.3 | 0.0  | 34.8 | -1.0  | SGN-U580736 | PAL (PHENYL ALANINE AMMONIA-LYASE)                                                       |
| SGN-E332099 | -1.2 | -1.3 | 0.0  | -1.3  | 1.1  | 1.2   | -1.6 | -2.4 | -1.6 | -4.3 | -2.2 | -4.3 | 0.0  | 34.8 | -1.0  | SGN-U580736 | PAL (PHENYL ALANINE AMMONIA-LYASE)                                                       |
| SGN-E703898 | 1.0  | -1.6 | 0.0  | -1.0  | 1.4  | 1.6   | -1.2 | -1.9 | -1.3 | -1.7 | -1.8 | -3.4 | 0.0  | 39.2 | 1.2   | SGN-U580736 | PAL (PHENYL ALANINE AMMONIA-LYASE)                                                       |



|             |      |      |      |      |       |      |       |      |      |      |       |      |      |      |      |             |                                                       |
|-------------|------|------|------|------|-------|------|-------|------|------|------|-------|------|------|------|------|-------------|-------------------------------------------------------|
| SGN-E265134 | -1.5 | 1.2  | 0.0  | 0.0  | 0.0   | -1.0 | -1.4  | -1.5 | -2.9 | 0.0  | 0.0   | 0.0  | 1.1  | 35.6 | -1.2 | SGN-U577677 | PAL (PHENYL ALANINE AMMONIA-LYASE)                    |
| SGN-E280687 | -2.0 | 1.2  | 0.0  | 0.0  | 0.0   | 1.9  | -1.3  | -1.3 | -1.3 | -3.5 | 0.0   | 0.0  | 2.2  | 42.1 | 1.2  | SGN-U577677 | PAL (PHENYL ALANINE AMMONIA-LYASE)                    |
| SGN-E354605 | 0.0  | 1.1  | -8.7 | -3.6 | -2.1  | -2.3 | -1.5  | -1.4 | -1.7 | -3.8 | -3.1  | -5.1 | -2.0 | 39.7 | -2.1 | SGN-U577677 | PAL (PHENYL ALANINE AMMONIA-LYASE)                    |
| SGN-E349491 | 0.0  | 1.1  | -8.7 | -3.6 | -2.1  | -2.3 | -1.5  | -1.4 | -1.7 | -3.8 | -3.1  | -5.1 | -2.0 | 39.7 | -2.1 | SGN-U577677 | PAL (PHENYL ALANINE AMMONIA-LYASE)                    |
| SGN-E286569 | -8.8 | 1.1  | -8.7 | -3.6 | -2.1  | -2.3 | -1.5  | -1.4 | -1.7 | -3.8 | -3.1  | -5.1 | -2.0 | 41.8 | -2.1 | SGN-U577677 | PAL (PHENYL ALANINE AMMONIA-LYASE)                    |
| SGN-E304497 | -8.8 | 1.1  | -8.7 | -3.6 | -2.1  | -2.4 | -1.5  | -1.5 | -1.7 | -3.8 | -3.1  | -5.1 | -2.0 | 37.7 | -2.1 | SGN-U577677 | PAL (PHENYL ALANINE AMMONIA-LYASE)                    |
| SGN-E205725 | 0.0  | 1.0  | -3.0 | -3.1 | -1.1  | 1.3  | -1.1  | -1.9 | -1.5 | -5.2 | 0.0   | -1.7 | 1.5  | 33.9 | -1.6 | SGN-U577677 | PAL (PHENYL ALANINE AMMONIA-LYASE)                    |
| SGN-E207172 | -1.6 | 1.1  | 0.0  | -6.8 | -2.4  | 1.0  | -1.2  | -1.6 | -1.3 | -5.7 | 0.0   | 0.0  | 1.5  | 34.9 | -1.3 | SGN-U577677 | PAL (PHENYL ALANINE AMMONIA-LYASE)                    |
| SGN-E298063 | -2.3 | 1.1  | -4.5 | -4.7 | -3.3  | -1.0 | -1.4  | -1.7 | 1.1  | -7.9 | 0.0   | -2.6 | 1.7  | 30.0 | -2.5 | SGN-U577677 | PAL (PHENYL ALANINE AMMONIA-LYASE)                    |
| SGN-E305836 | -3.8 | 1.1  | 0.0  | -7.8 | -2.7  | 1.1  | -1.2  | -1.8 | -1.5 | -6.6 | 0.0   | -3.3 | 1.3  | 30.2 | -1.5 | SGN-U577677 | PAL (PHENYL ALANINE AMMONIA-LYASE)                    |
| SGN-E205183 | -4.3 | 1.2  | -4.2 | -8.9 | -3.1  | 1.1  | -1.2  | -2.1 | -1.4 | -7.4 | 0.0   | -2.5 | 1.4  | 29.5 | -1.8 | SGN-U577677 | PAL (PHENYL ALANINE AMMONIA-LYASE)                    |
| SGN-E736096 | -3.8 | -1.2 | 0.0  | -1.5 | -1.8  | -1.3 | -1.8  | -2.4 | -3.6 | 0.0  | -3.3  | -1.1 | -3.3 | 33.0 | -2.0 | SGN-U580050 | PAL (PHENYL ALANINE AMMONIA-LYASE)                    |
| SGN-E736034 | -3.8 | -1.2 | 0.0  | -1.5 | -1.8  | -1.3 | -1.8  | -2.4 | -3.6 | 0.0  | -3.3  | -1.1 | -6.7 | 32.5 | -2.0 | SGN-U580050 | PAL (PHENYL ALANINE AMMONIA-LYASE)                    |
| SGN-E311991 | -3.3 | -1.1 | 0.0  | -2.2 | -2.3  | -2.2 | -2.0  | -2.1 | 0.0  | 0.0  | -2.9  | -1.4 | -5.8 | 27.6 | -2.7 | SGN-U580050 | PAL (PHENYL ALANINE AMMONIA-LYASE)                    |
| SGN-E336129 | 0.0  | -1.1 | -4.0 | -2.1 | -5.7  | -1.9 | -1.5  | -1.3 | -1.5 | -2.3 | -1.8  | -7.0 | -1.4 | 35.4 | -2.2 | SGN-U577677 | phenylalanine ammonia-lyase/2C putative               |
| SGN-E323057 | -3.4 | -1.1 | -6.7 | -2.0 | -3.2  | -2.9 | -1.4  | -2.6 | -1.6 | -2.9 | -2.4  | -2.9 | -3.0 | 32.1 | -1.8 | SGN-U577677 | PAL (PHENYL ALANINE AMMONIA-LYASE)                    |
| SGN-E303178 | 2.0  | 1.2  | 0.0  | 0.0  | 2.8   | 5.0  | 4.2   | 1.0  | 2.0  | 5.7  | 2.2   | 2.3  | 6.6  | 37.5 | 4.8  | SGN-U577677 | PAL (PHENYL ALANINE AMMONIA-LYASE)                    |
| SGN-E228199 | 2.0  | 1.2  | 0.0  | 0.0  | -1.5  | 2.1  | 1.0   | -1.9 | 1.0  | 2.9  | -1.8  | 1.7  | 1.7  | 26.4 | 1.2  | SGN-U577677 | PAL (PHENYL ALANINE AMMONIA-LYASE)                    |
| SGN-E376010 | 0.0  | -1.1 | 0.0  | -2.1 | 1.0   | -1.2 | 1.9   | -1.3 | -3.9 | 1.4  | 0.0   | 1.4  | 2.5  | 25.4 | -1.6 | SGN-U580050 | PAL (PHENYL ALANINE AMMONIA-LYASE)                    |
| SGN-E289786 | 1.1  | 1.1  | 0.0  | -3.6 | -1.3  | 1.7  | 1.5   | -3.4 | 1.5  | 1.6  | -1.6  | 1.3  | 2.2  | 17.1 | 1.4  | SGN-U577677 | PAL (PHENYL ALANINE AMMONIA-LYASE)                    |
| SGN-E206146 | -1.6 | -1.1 | -1.1 | -2.2 | -2.3  | 1.4  | 1.1   | -3.1 | 1.4  | 1.1  | -1.9  | 1.2  | 2.1  | 20.1 | -1.1 | SGN-U577677 | PAL (PHENYL ALANINE AMMONIA-LYASE)                    |
| SGN-E200349 | 0.0  | 1.2  | -2.0 | 0.0  | -2.9  | -3.2 | -1.9  | -3.9 | -2.0 | -1.2 | -3.6  | 0.0  | -1.8 | 26.2 | -1.1 | SGN-U577677 | PAL (PHENYL ALANINE AMMONIA-LYASE)                    |
| SGN-E308375 | 0.0  | 1.2  | -2.5 | 0.0  | -3.6  | -3.0 | -2.4  | -4.9 | -1.6 | -1.5 | -4.5  | 0.0  | -1.5 | 24.0 | -1.4 | SGN-U577677 | PAL (PHENYL ALANINE AMMONIA-LYASE)                    |
| SGN-E200348 | -4.3 | 1.0  | -1.1 | -2.9 | -1.5  | 1.1  | -1.2  | -2.7 | -1.4 | -3.7 | -7.6  | -1.9 | 1.3  | 26.4 | -2.3 | SGN-U577677 | PAL (PHENYL ALANINE AMMONIA-LYASE)                    |
| SGN-E212120 | -2.7 | 1.1  | -1.7 | -3.6 | -3.8  | -1.1 | -1.4  | -2.5 | -1.0 | -4.6 | -9.4  | -3.1 | 1.3  | 27.2 | -2.2 | SGN-U577677 | PAL (PHENYL ALANINE AMMONIA-LYASE)                    |
| SGN-E241239 | 0.0  | 1.1  | -1.5 | -4.7 | -3.3  | 1.0  | -1.2  | -2.2 | -1.3 | -3.9 | -8.1  | -2.6 | 1.2  | 24.5 | -1.9 | SGN-U577677 | PAL (PHENYL ALANINE AMMONIA-LYASE)                    |
| SGN-E304081 | 0.0  | 1.1  | -1.7 | -3.6 | -3.8  | -1.1 | -1.4  | -2.5 | -1.1 | -4.6 | -9.4  | -3.1 | 1.2  | 21.6 | -2.2 | SGN-U577677 | PAL (PHENYL ALANINE AMMONIA-LYASE)                    |
| SGN-E309768 | -3.3 | 1.1  | -3.2 | -6.8 | -2.4  | -3.9 | -3.1  | -6.3 | -2.1 | -1.4 | -5.8  | 0.0  | -2.0 | 18.7 | -1.8 | SGN-U577677 | PAL (PHENYL ALANINE AMMONIA-LYASE)                    |
| SGN-E349300 | -3.3 | 1.1  | -3.2 | -6.8 | -4.7  | -5.2 | -3.1  | -6.3 | -2.1 | -1.4 | -5.8  | 0.0  | -2.0 | 18.0 | -1.8 | SGN-U577677 | PAL (PHENYL ALANINE AMMONIA-LYASE)                    |
| SGN-E738936 | -3.0 | 1.0  | -1.5 | -3.1 | -1.4  | 1.2  | -1.0  | -2.9 | -1.1 | -1.5 | -3.6  | -1.3 | 1.7  | 21.8 | -1.6 | SGN-U577677 | PAL (PHENYL ALANINE AMMONIA-LYASE)                    |
| SGN-E301501 | -4.0 | 1.1  | -1.3 | -4.2 | -2.9  | 1.3  | -1.3  | -1.5 | 1.2  | -1.2 | -3.6  | -1.2 | 1.8  | 19.5 | -1.6 | SGN-U577677 | PAL (PHENYL ALANINE AMMONIA-LYASE)                    |
| SGN-E298210 | -2.1 | 1.0  | -2.1 | -2.9 | -3.1  | 1.1  | -1.3  | -2.0 | 1.3  | -1.1 | -3.8  | -1.2 | 1.4  | 17.5 | -2.3 | SGN-U577677 | PAL (PHENYL ALANINE AMMONIA-LYASE)                    |
| SGN-E210268 | -3.8 | -1.0 | -1.2 | -2.6 | -2.7  | -1.3 | -1.2  | -2.4 | 1.2  | -2.2 | -6.7  | -1.3 | 1.6  | 18.8 | -3.1 | SGN-U577677 | PAL (PHENYL ALANINE AMMONIA-LYASE)                    |
| SGN-E291356 | -5.3 | 1.1  | -1.7 | -3.6 | -3.8  | -1.1 | -1.4  | -2.5 | -1.1 | -4.6 | -9.4  | -3.1 | 1.2  | 21.6 | -2.2 | SGN-U577677 | PAL (PHENYL ALANINE AMMONIA-LYASE)                    |
| SGN-E304260 | -2.9 | 1.1  | -1.9 | -4.0 | -4.2  | -1.2 | -1.4  | -2.8 | -1.1 | -5.0 | -10.3 | -3.4 | 1.2  | 21.1 | -2.4 | SGN-U577677 | PAL (PHENYL ALANINE AMMONIA-LYASE)                    |
| SGN-E210324 | -5.3 | 1.1  | -1.7 | -3.6 | -3.8  | -1.2 | -1.4  | -2.5 | -1.0 | -1.5 | -9.4  | -1.5 | 1.5  | 16.4 | -2.2 | SGN-U577677 | PAL (PHENYL ALANINE AMMONIA-LYASE)                    |
| SGN-E303794 | -5.3 | 1.1  | -1.7 | -3.6 | -3.8  | -1.2 | -1.4  | -2.5 | -1.0 | -4.6 | -9.4  | -3.1 | 1.2  | 15.5 | -2.9 | SGN-U577677 | PAL (PHENYL ALANINE AMMONIA-LYASE)                    |
| SGN-E204856 | -2.0 | -1.1 | -2.0 | -2.1 | 1.4   | 1.6  | 1.1   | 1.0  | 1.5  | -3.5 | 0.0   | -1.2 | 2.2  | 59.7 | 1.5  | SGN-U577677 | PAL (PHENYL ALANINE AMMONIA-LYASE)                    |
| SGN-E307792 | -2.8 | 1.0  | -5.5 | -2.9 | -1.6  | -2.9 | -2.1  | -1.5 | -2.7 | -4.8 | -3.3  | -2.4 | -2.0 | 64.4 | -3.0 | SGN-U577677 | PAL (PHENYL ALANINE AMMONIA-LYASE)                    |
| SGN-E212083 | -1.7 | 1.0  | -2.2 | -2.8 | -3.2  | -1.1 | -1.4  | -1.9 | -1.1 | -3.9 | -12.1 | -3.9 | 1.7  | 57.2 | -2.2 | SGN-U577677 | PAL (PHENYL ALANINE AMMONIA-LYASE)                    |
| SGN-E378130 | -3.4 | -1.2 | -1.7 | -1.5 | -1.9  | -1.9 | -2.1  | -1.8 | -1.9 | -5.8 | -6.0  | -5.9 | -2.0 | 54.0 | -1.6 | SGN-U577677 | PAL (PHENYL ALANINE AMMONIA-LYASE)                    |
| SGN-E706559 | -1.5 | -1.1 | -1.5 | -2.1 | -1.7  | 1.0  | -1.1  | -1.9 | 1.1  | -2.1 | -10.7 | -1.5 | 2.0  | 47.8 | -1.6 | SGN-U577677 | PAL (PHENYL ALANINE AMMONIA-LYASE)                    |
| SGN-E233499 | -1.5 | -1.2 | 2.0  | -1.5 | 0.0   | 5.3  | -2.8  | 2.8  | 2.4  | 36.3 | -1.3  | 13.1 | 11.6 | 0.0  | 29.0 | SGN-U581284 | terpene synthase/cyclase family protein               |
| SGN-E546080 | -1.4 | -2.2 | 1.7  | 1.3  | 0.0   | 3.6  | -3.9  | 1.9  | 1.1  | 30.6 | -2.5  | 11.0 | 12.1 | -1.2 | 27.8 | SGN-U581284 | pseudogene/2C similar to vetispiradiene synthase      |
| SGN-E389935 | 1.2  | -1.0 | 1.2  | -2.6 | 0.0   | 3.2  | 1.1   | 2.1  | 1.6  | 22.1 | -1.5  | 8.2  | 6.9  | 1.1  | 17.3 | SGN-U581284 | terpene synthase/cyclase family protein               |
| SGN-E688091 | -7.5 | 0.0  | 1.2  | 2.0  | -10.7 | 3.1  | -14.1 | 1.5  | -1.0 | 25.3 | -2.7  | 8.7  | 9.9  | -4.5 | 24.5 | SGN-U579603 | terpene synthase/cyclase family protein               |
| SGN-E246031 | -4.1 | 0.0  | 2.2  | 2.0  | 0.0   | 5.8  | -3.9  | 2.3  | 1.0  | 47.3 | -2.4  | 16.7 | 18.9 | -3.7 | 48.1 | SGN-U578127 | terpene synthase/cyclase family protein               |
| SGN-E391776 | 0.0  | 1.2  | 0.0  | 0.0  | 0.0   | 0.0  | 0.0   | 1.0  | 0.0  | 0.0  | 65.4  | 0.0  | 17.7 | 0.0  | 0.0  | SGN-U584082 | YUC10/ monooxygenase                                  |
| SGN-E246737 | 0.0  | 1.2  | 0.0  | 0.0  | 0.0   | 0.0  | 0.0   | 1.0  | 0.0  | 0.0  | 65.4  | 0.0  | 17.7 | 0.0  | 0.0  | SGN-U584082 | YUC11/ monooxygenase                                  |
| SGN-E396200 | 0.0  | 1.2  | 0.0  | 0.0  | 0.0   | 0.0  | 0.0   | 1.0  | 0.0  | 0.0  | 65.4  | 0.0  | 17.7 | 0.0  | 0.0  | SGN-U584082 | YUC11/ monooxygenase                                  |
| SGN-E306646 | 1.2  | -1.1 | -1.3 | -2.1 | 1.0   | -9.4 | 67.5  | 56.2 | 1.2  | 59.3 | 2.1   | 61.1 | 29.7 | 63.1 | 2.7  | SGN-U592085 | LHCA2 (Photosystem I light harvesting complex gene 2) |
| SGN-E283674 | 1.4  | -1.4 | -2.1 | -1.2 | 1.8   | -1.8 | -1.3  | -1.0 | 1.1  | 1.5  | -1.9  | -1.2 | 1.9  | 96.3 | -1.4 | SGN-U577677 | PAL (PHENYL ALANINE AMMONIA-LYASE)                    |
| SGN-E209052 | 1.4  | -1.4 | -2.1 | -1.2 | 1.8   | -1.8 | -1.3  | -1.0 | 1.1  | 1.5  | -1.9  | -1.2 | 1.9  | 93.5 | -1.4 | SGN-U577677 | PAL (PHENYL ALANINE AMMONIA-LYASE)                    |
| SGN-E290404 | 1.5  | -1.5 | -1.3 | -1.1 | 2.3   | -1.4 | -2.6  | 1.1  | 1.3  | 1.9  | -1.2  | -1.6 | -1.6 | 97.3 | -1.1 | SGN-U577677 | PAL (PHENYL ALANINE AMMONIA-LYASE)                    |
| SGN-E265996 | 1.5  | -1.5 | -1.3 | -1.1 | 2.3   | -1.8 | -2.6  | 1.1  | 1.3  | 1.7  | -4.9  | -1.2 | -2.4 | 92.6 | -1.1 | SGN-U577677 | PAL (PHENYL ALANINE AMMONIA-LYASE)                    |

|             |      |      |      |      |      |      |      |      |      |      |       |      |      |       |      |             |                                    |
|-------------|------|------|------|------|------|------|------|------|------|------|-------|------|------|-------|------|-------------|------------------------------------|
| SGN-E320183 | 1.1  | -1.1 | 0.0  | -2.2 | -1.3 | 1.1  | 1.2  | -1.1 | 1.2  | -1.5 | 0.0   | -1.3 | 2.7  | 95.0  | -1.4 | SGN-U577677 | PAL (PHENYL ALANINE AMMONIA-LYASE) |
| SGN-E698861 | 1.2  | -1.1 | 0.0  | -2.1 | -1.4 | -1.4 | -1.1 | -1.3 | -1.1 | -1.0 | -3.6  | -2.6 | 2.4  | 99.3  | -1.2 | SGN-U577677 | PAL (PHENYL ALANINE AMMONIA-LYASE) |
| SGN-E739096 | -3.0 | -1.0 | -3.0 | -2.5 | -1.2 | -2.2 | -1.2 | -1.0 | -1.1 | -1.6 | -3.6  | -2.3 | -1.8 | 92.0  | -1.6 | SGN-U577677 | PAL (PHENYL ALANINE AMMONIA-LYASE) |
| SGN-E711810 | -3.0 | -1.0 | -2.9 | -2.7 | -1.2 | -2.1 | -1.2 | -1.1 | -1.1 | -2.0 | -3.5  | -2.3 | -1.8 | 91.6  | -1.6 | SGN-U577677 | PAL (PHENYL ALANINE AMMONIA-LYASE) |
| SGN-E738005 | -3.0 | -1.0 | -2.4 | -2.5 | -1.2 | -2.2 | -1.2 | -1.2 | -1.1 | -2.1 | -3.6  | -2.3 | -1.8 | 89.0  | -1.8 | SGN-U577677 | PAL (PHENYL ALANINE AMMONIA-LYASE) |
| SGN-E214120 | 1.1  | -1.1 | -6.4 | -2.2 | -1.9 | -1.5 | -1.8 | -1.4 | -1.4 | -1.1 | -3.9  | -2.8 | 2.2  | 91.4  | -1.3 | SGN-U577677 | PAL (PHENYL ALANINE AMMONIA-LYASE) |
| SGN-E285103 | -3.4 | 1.0  | -3.4 | -3.0 | -1.6 | -2.4 | -1.1 | -1.1 | -1.1 | -2.2 | -3.7  | -2.6 | -1.5 | 98.6  | -1.5 | SGN-U577677 | PAL (PHENYL ALANINE AMMONIA-LYASE) |
| SGN-E214681 | -3.4 | 1.0  | -3.4 | -3.0 | -1.8 | -2.4 | -1.1 | -1.1 | -1.1 | -2.2 | -3.7  | -2.6 | -1.5 | 98.3  | -1.5 | SGN-U577677 | PAL (PHENYL ALANINE AMMONIA-LYASE) |
| SGN-E304372 | -4.9 | 1.1  | -3.2 | -4.1 | -2.0 | -2.4 | -1.1 | -1.3 | -1.1 | -2.4 | -3.5  | -2.4 | -1.8 | 98.4  | -1.5 | SGN-U577677 | PAL (PHENYL ALANINE AMMONIA-LYASE) |
| SGN-E279008 | -5.2 | 1.0  | -3.4 | -3.0 | -1.3 | -2.2 | -1.1 | -1.0 | -1.2 | -3.6 | -3.7  | -2.6 | -1.7 | 101.3 | -1.5 | SGN-U577677 | PAL (PHENYL ALANINE AMMONIA-LYASE) |
| SGN-E214126 | -3.9 | -1.1 | -2.3 | -2.0 | -1.1 | -2.2 | -1.4 | -1.1 | -1.2 | -2.0 | -10.2 | -2.5 | -1.9 | 98.5  | -1.6 | SGN-U577677 | PAL (PHENYL ALANINE AMMONIA-LYASE) |
| SGN-E241007 | -4.9 | 1.0  | -3.2 | -2.9 | -1.4 | -2.1 | -1.1 | 1.0  | -1.2 | -3.4 | -3.5  | -2.4 | -1.6 | 106.1 | -1.5 | SGN-U577677 | PAL (PHENYL ALANINE AMMONIA-LYASE) |
| SGN-E308905 | -4.9 | 1.0  | -3.2 | -2.9 | -1.3 | -2.1 | -1.1 | 1.0  | -1.2 | -2.4 | -3.5  | -2.4 | -1.6 | 104.7 | -1.5 | SGN-U577677 | PAL (PHENYL ALANINE AMMONIA-LYASE) |
| SGN-E286786 | -2.8 | -1.0 | -2.2 | -2.6 | -1.1 | -2.0 | -1.1 | -1.0 | -1.1 | -2.0 | -3.3  | -2.2 | -1.5 | 104.1 | -1.4 | SGN-U577677 | PAL (PHENYL ALANINE AMMONIA-LYASE) |
| SGN-E346721 | -2.7 | -1.0 | -2.1 | -2.5 | -1.0 | -1.9 | -1.1 | 1.0  | 1.0  | -1.9 | -3.2  | -2.1 | -1.5 | 108.4 | -1.4 | SGN-U577677 | PAL (PHENYL ALANINE AMMONIA-LYASE) |
| SGN-E304219 | -3.7 | 1.1  | -2.4 | -5.0 | -2.1 | -2.6 | -1.3 | -1.3 | 1.1  | -3.2 | 0.0   | -3.2 | -1.4 | 111.7 | -1.3 | SGN-U577677 | PAL (PHENYL ALANINE AMMONIA-LYASE) |
| SGN-E281116 | -1.1 | -1.3 | -1.6 | -1.3 | 1.5  | -2.2 | -3.0 | 1.1  | 1.3  | 1.1  | -5.8  | -1.1 | -1.9 | 111.9 | -1.1 | SGN-U577677 | PAL (PHENYL ALANINE AMMONIA-LYASE) |
| SGN-E304522 | 1.3  | -1.0 | 0.0  | -2.3 | -1.6 | -1.2 | -1.2 | -1.2 | -1.1 | 1.2  | -2.7  | -2.0 | 2.5  | 109.9 | -1.2 | SGN-U577677 | PAL (PHENYL ALANINE AMMONIA-LYASE) |
| SGN-E301998 | 1.1  | -1.4 | -1.7 | -1.2 | -2.5 | -2.0 | -1.6 | -3.3 | -3.4 | 1.7  | -1.0  | -1.5 | -1.0 | 108.9 | -2.8 | SGN-U577677 | PAL (PHENYL ALANINE AMMONIA-LYASE) |
| SGN-E268405 | 1.1  | -1.0 | 0.0  | -2.6 | -2.7 | 1.0  | -1.0 | -1.8 | -1.5 | -1.6 | -2.2  | -2.2 | 3.0  | 107.8 | -1.5 | SGN-U577677 | PAL (PHENYL ALANINE AMMONIA-LYASE) |
| SGN-E316202 | 1.1  | -1.0 | 0.0  | -2.6 | -2.7 | -1.1 | -1.0 | -1.8 | -1.2 | -2.2 | -2.2  | -2.2 | 2.8  | 104.6 | -1.2 | SGN-U577677 | PAL (PHENYL ALANINE AMMONIA-LYASE) |
| SGN-E238020 | -5.0 | -1.1 | -2.5 | -2.1 | -1.8 | -2.5 | -1.5 | -1.1 | -1.4 | -2.5 | -17.8 | -2.9 | -1.6 | 105.8 | -1.5 | SGN-U577677 | PAL (PHENYL ALANINE AMMONIA-LYASE) |
| SGN-E242040 | -5.1 | -1.1 | -2.5 | -1.9 | -1.3 | -2.3 | -1.5 | -1.0 | -1.7 | -3.6 | -18.2 | -3.0 | -1.7 | 106.8 | -1.5 | SGN-U577677 | PAL (PHENYL ALANINE AMMONIA-LYASE) |
| SGN-E201694 | 1.2  | -1.4 | -2.1 | -1.2 | 1.3  | -2.5 | -1.3 | -1.6 | 1.1  | 1.4  | -1.9  | -1.5 | 1.3  | 83.2  | -1.7 | SGN-U577677 | PAL (PHENYL ALANINE AMMONIA-LYASE) |
| SGN-E302638 | -1.0 | -1.0 | 0.0  | -2.6 | -1.8 | -1.2 | 1.1  | -1.4 | -1.2 | -1.4 | -3.0  | -2.9 | 2.7  | 86.6  | -1.6 | SGN-U577677 | PAL (PHENYL ALANINE AMMONIA-LYASE) |
| SGN-E323308 | -1.0 | -1.0 | -6.9 | -2.4 | -1.7 | -1.1 | -1.1 | -1.1 | 1.0  | -1.1 | -4.2  | -1.7 | 2.2  | 79.8  | -1.4 | SGN-U577677 | PAL (PHENYL ALANINE AMMONIA-LYASE) |
| SGN-E307128 | -1.1 | -1.2 | -3.3 | -1.5 | 1.6  | -2.0 | -1.6 | 1.1  | -1.2 | -1.2 | -12.0 | -2.0 | 1.5  | 74.6  | -1.8 | SGN-U577677 | PAL (PHENYL ALANINE AMMONIA-LYASE) |
| SGN-E303368 | -1.5 | -1.1 | -3.0 | -2.1 | 1.5  | -1.8 | -2.3 | 1.0  | -1.3 | -1.3 | -10.7 | -2.1 | -1.8 | 77.7  | -1.6 | SGN-U577677 | PAL (PHENYL ALANINE AMMONIA-LYASE) |
| SGN-E319164 | -5.0 | -1.0 | -5.0 | -2.6 | -1.0 | -1.6 | -2.4 | -1.2 | -4.9 | -2.2 | -8.9  | -2.9 | -1.3 | 79.5  | -2.7 | SGN-U577677 | PAL (PHENYL ALANINE AMMONIA-LYASE) |
| SGN-E207605 | -1.5 | -1.1 | -2.2 | -2.0 | 1.2  | -2.1 | -1.4 | 1.1  | 1.0  | -1.1 | -3.9  | -1.5 | -1.4 | 135.0 | -1.4 | SGN-U577677 | PAL (PHENYL ALANINE AMMONIA-LYASE) |
| SGN-E302639 | -2.3 | -1.0 | -2.3 | -2.4 | -1.4 | -2.1 | 1.1  | 1.1  | 1.2  | -1.5 | -2.5  | -2.0 | -1.3 | 134.9 | -1.1 | SGN-U577677 | PAL (PHENYL ALANINE AMMONIA-LYASE) |
| SGN-E242042 | -2.2 | -1.2 | -1.6 | -1.7 | 1.3  | -1.8 | -1.1 | 1.3  | 1.0  | -1.9 | -5.8  | -1.9 | -1.4 | 138.3 | -1.2 | SGN-U577677 | PAL (PHENYL ALANINE AMMONIA-LYASE) |
| SGN-E301663 | 1.8  | -1.5 | -3.7 | -1.6 | -1.1 | -1.6 | -1.2 | 1.1  | 1.2  | 1.5  | -2.3  | -1.7 | 3.0  | 139.4 | -1.6 | SGN-U577677 | PAL (PHENYL ALANINE AMMONIA-LYASE) |
| SGN-E204184 | 2.0  | 1.2  | 0.0  | 0.0  | 0.0  | 2.1  | 1.0  | 0.0  | 0.0  | 0.0  | 0.0   | 0.0  | 1.1  | 139.9 | 2.4  | SGN-U577677 | PAL (PHENYL ALANINE AMMONIA-LYASE) |
| SGN-E303723 | 1.8  | -1.1 | 0.0  | -1.9 | -2.0 | 1.0  | 1.5  | -1.1 | 1.1  | 1.1  | -1.6  | -1.6 | 3.7  | 133.8 | 1.1  | SGN-U577677 | PAL (PHENYL ALANINE AMMONIA-LYASE) |
| SGN-E215107 | 1.6  | -1.1 | -4.2 | -1.8 | 1.3  | -1.3 | -1.1 | -1.0 | 1.3  | 1.5  | -1.9  | -1.2 | 2.6  | 130.4 | -1.2 | SGN-U577677 | PAL (PHENYL ALANINE AMMONIA-LYASE) |
| SGN-E242924 | -1.6 | -1.2 | -2.0 | -1.7 | 1.4  | -1.8 | -1.3 | 1.4  | 1.1  | -1.4 | -14.2 | -1.5 | -1.4 | 146.3 | -1.2 | SGN-U577677 | PAL (PHENYL ALANINE AMMONIA-LYASE) |
| SGN-E739118 | -2.4 | -1.2 | -2.4 | -1.7 | 1.3  | -2.0 | -1.2 | 1.2  | 1.0  | -2.1 | -12.9 | -1.6 | -1.6 | 133.1 | -1.7 | SGN-U577677 | PAL (PHENYL ALANINE AMMONIA-LYASE) |
| SGN-E208908 | 1.7  | -1.5 | -2.3 | -1.6 | 1.2  | -1.5 | -1.2 | 1.0  | 1.3  | 1.4  | -2.0  | -1.3 | 2.4  | 122.3 | -1.3 | SGN-U577677 | PAL (PHENYL ALANINE AMMONIA-LYASE) |
| SGN-E325555 | 1.6  | -1.2 | -4.4 | -1.5 | 1.1  | -1.3 | -1.1 | -1.1 | 1.0  | 1.4  | -2.0  | -1.6 | 2.5  | 124.0 | -1.2 | SGN-U577677 | PAL (PHENYL ALANINE AMMONIA-LYASE) |
| SGN-E214424 | 1.5  | -1.1 | 0.0  | -2.1 | -1.4 | -1.3 | -1.1 | -1.1 | 1.0  | 1.3  | -2.4  | -1.7 | 2.8  | 122.4 | -1.1 | SGN-U577677 | PAL (PHENYL ALANINE AMMONIA-LYASE) |
| SGN-E266877 | 1.2  | -1.1 | 0.0  | -2.2 | -2.3 | -1.2 | -1.0 | -1.6 | -1.3 | -1.4 | -1.9  | -1.9 | 3.3  | 121.5 | -1.8 | SGN-U577677 | PAL (PHENYL ALANINE AMMONIA-LYASE) |
| SGN-E240427 | -2.3 | -1.0 | -2.3 | -2.7 | 1.1  | -1.9 | 1.1  | 1.1  | 1.1  | -2.3 | -3.3  | -1.8 | -1.5 | 118.5 | -1.5 | SGN-U577677 | PAL (PHENYL ALANINE AMMONIA-LYASE) |
| SGN-E235452 | -4.3 | -1.2 | -2.8 | -1.5 | -1.7 | -2.5 | -1.2 | -1.0 | -1.0 | -1.8 | 0.0   | -2.1 | -1.1 | 120.4 | -1.7 | SGN-U578065 | PAL (PHENYL ALANINE AMMONIA-LYASE) |
| SGN-E201367 | -2.3 | -1.1 | -2.2 | -1.9 | 1.1  | -1.8 | 1.0  | 1.2  | 1.1  | -2.2 | -3.2  | -1.6 | -1.5 | 126.8 | -1.5 | SGN-U577677 | PAL (PHENYL ALANINE AMMONIA-LYASE) |
| SGN-E209819 | 2.0  | -1.6 | 0.0  | -2.1 | -1.4 | -1.0 | 1.6  | 1.0  | 1.3  | -1.7 | 0.0   | -1.2 | 5.3  | 150.2 | -1.6 | SGN-U577677 | PAL (PHENYL ALANINE AMMONIA-LYASE) |
| SGN-E304765 | -1.3 | -1.1 | -1.9 | -1.8 | 1.4  | -1.8 | -1.3 | 1.3  | 1.1  | -1.0 | -3.4  | -1.5 | -1.3 | 147.0 | -1.3 | SGN-U577677 | PAL (PHENYL ALANINE AMMONIA-LYASE) |
| SGN-E207888 | 2.0  | 1.2  | 0.0  | 0.0  | 0.0  | 2.9  | 1.0  | 3.1  | 0.0  | 0.0  | 0.0   | 1.1  | 2.2  | 162.0 | 1.2  | SGN-U581452 | PAL (PHENYL ALANINE AMMONIA-LYASE) |
| SGN-E200633 | 1.6  | -1.0 | 0.0  | -2.6 | -1.8 | 1.9  | -1.2 | 1.2  | 1.2  | -2.2 | 0.0   | 0.0  | 2.7  | 208.7 | 1.5  | SGN-U577677 | PAL (PHENYL ALANINE AMMONIA-LYASE) |
| SGN-E277402 | -2.5 | -1.0 | -2.5 | -2.6 | -1.2 | -2.1 | 1.1  | 1.4  | 1.1  | -1.4 | -3.0  | -1.2 | 1.1  | 187.5 | -1.4 | SGN-U577677 | PAL (PHENYL ALANINE AMMONIA-LYASE) |

**Supplementary Table SIV.** Transgressive sRNA loci targeting cDNAs that are marked to show distinct transgressive features. Values are normalized sRNA abundance.

| SGN-EST     | Gene/High homology                                         | M82-1 | M82-2 | S.penn-1 | S.penn-2 | F1  | IL1-1 | IL2-5 | IL8-1-1 | IL8-1D | IL8-1-3 | IL8-2 | IL8-2-1 | IL8-3 | IL8-3-1 | Observations                 |
|-------------|------------------------------------------------------------|-------|-------|----------|----------|-----|-------|-------|---------|--------|---------|-------|---------|-------|---------|------------------------------|
| SGN-E229629 | Nascent polypeptide alpha chain protein, putativealpha-NAC | 66    | 102   | 76       | 134      | 18  | 2     | 2     | 8       | 1      | 1       | 6     | 4       | 4     | 1       | High in parents              |
| SGN-E239386 | Seven in absentia (SINA) family protein                    | 52    | 83    | 61       | 164      | 18  | 2     | 1     | 6       | 0      | 0       | 7     | 4       | 4     | 1       | High in parents              |
| SGN-E552623 | unknown                                                    | 85    | 155   | 95       | 193      | 25  | 2     | 3     | 7       | 0      | 0       | 10    | 6       | 0     | 1       | High in parents              |
| SGN-E719396 | ATEM1 (Early methionine labelled)                          | 33    | 124   | 48       | 164      | 20  | 1     | 3     | 5       | 2      | 0       | 2     | 9       | 3     | 1       | High in parents              |
| SGN-E578128 | Hydrolase, alpha/beta fold family protein                  | 51    | 61    | 35       | 80       | 105 | 14    | 84    | 4       | 10     | 122     | 3     | 8       | 29    | 7       | Activation in F1             |
| SGN-E296258 | LHCA2 (Photosystem I light harvesting complex gene 2)      | 37    | 150   | 96       | 213      | 414 | 50    | 40    | 85      | 52     | 80      | 65    | 74      | 260   | 71      | Activation in F1             |
| SGN-E389790 | Unknown                                                    | 61    | 77    | 114      | 275      | 951 | 35    | 44    | 46      | 69     | 74      | 17    | 23      | 37    | 63      | Activation in F1             |
| SGN-E744425 | Unknown                                                    | 2     | 0     | 395      | 616      | 163 | 5     | 3     | 0       | 2      | 3       | 1     | 2       | 2     | 627     | MPV in F1                    |
| SGN-E324054 | disease resistance protein (NBS-LRR class), putative       | 0     | 0     | 54       | 204      | 76  | 0     | 0     | 0       | 0      | 0       | 0     | 1       | 155   | 0       | MPV in F1                    |
| SGN-E549037 | AOX2 (alternative oxidase 2); alternative oxidase          | 205   | 174   | 0        | 0        | 71  | 290   | 241   | 261     | 301    | 0       | 1     | 2       | 206   | 289     | MPV in F1                    |
| SGN-E214112 | Unknown                                                    | 1314  | 3276  | 1        | 10       | 522 | 9     | 2761  | 15      | 2157   | 40      | 16    | 16      | 154   | 4467    | MPV in F1                    |
| SGN-E312996 | S-adenosylmethionine-dependent methyltransferase           | 37    | 135   | 0        | 0        | 5   | 92    | 39    | 52      | 42     | 67      | 92    | 65      | 25    | 0       | Reduction in F1              |
| SGN-E697787 | Transcriptional factor B3 family protein                   | 408   | 613   | 4        | 4        | 25  | 1086  | 1797  | 989     | 1489   | 1027    | 2373  | 2887    | 882   | 827     | Activating in one or manyILs |
| SGN-E304219 | PAL (PHENYL ALANINE AMMONIA-LYASE)                         | 2     | 13    | 3        | 3        | 5   | 11    | 11    | 15      | 4      | 0       | 4     | 9       | 1463  | 9       | Activating in one IL         |
| SGN-E739672 | PAL (PHENYL ALANINE AMMONIA-LYASE)                         | 10    | 18    | 4        | 13       | 17  | 23    | 25    | 27      | 16     | 8       | 13    | 29      | 2769  | 13      | Activating in one IL         |
| SGN-E373983 | Pectinacylesterase family protein                          | 2     | 2     | 90       | 141      | 17  | 1     | 1     | 442     | 356    | 2       | 5     | 1       | 0     | 0       | Activating in few ILs        |
| SGN-E577553 | Copper-binding family protein                              | 11    | 36    | 8        | 22       | 96  | 37    | 109   | 73      | 137    | 207     | 14    | 20      | 110   | 13      | Activating in few ILs        |
| SGN-E246031 | Terpene synthase/cyclase family protein                    | 1     | 0     | 9        | 17       | 0   | 2     | 18    | 8       | 336    | 3       | 119   | 138     | 2     | 323     | Activating in few ILs        |
| SGN-E238040 | Endonuclease/exonuclease/phosphatase family protein        | 0     | 0     | 0        | 0        | 0   | 1     | 0     | 129     | 0      | 0       | 0     | 58      | 0     | 0       | Activating in few ILs        |
| SGN-E390928 | CYP79F1 (SUPERSHOOT 1)                                     | 15    | 8     | 0        | 2        | 2   | 9     | 4     | 7       | 10     | 8       | 9     | 7       | 181   | 14      | Activating in few ILs        |
| SGN-E555182 | Unknown                                                    | 2     | 1     | 1        | 0        | 1   | 120   | 0     | 0       | 5      | 3       | 0     | 135     | 3     | 92      | Activating in few ILs        |
| SGN-E315555 | Zinc finger (C3HC4-type RING finger) family protein        | 1     | 2     | 0        | 0        | 0   | 2     | 1     | 109     | 2      | 0       | 1     | 49      | 0     | 0       | Activating in few ILs        |
| SGN-E577818 | Unknown                                                    | 7     | 9     | 20       | 50       | 24  | 33    | 15    | 25      | 12     | 20      | 9     | 18      | 579   | 8       | Activating in few ILs        |
| SGN-E306646 | LHCA2 (Photosystem I light harvesting complex gene 2)-like | 5     | 6     | 3        | 4        | 6   | 510   | 432   | 9       | 411    | 15      | 426   | 212     | 453   | 18      | Activating in many ILs       |
| SGN-E317484 | Unknown                                                    | 0     | 0     | 0        | 0        | 0   | 200   | 198   | 177     | 156    | 79      | 12    | 16      | 103   | 1       | Activating in many ILs       |
| SGN-E353135 | Encodes a Wound-induced protein (WIP) family protein       | 0     | 9     | 0        | 0        | 2   | 110   | 109   | 94      | 48     | 84      | 65    | 82      | 68    | 56      | Activating in many ILs       |

**Supplementary Table SV.** Number of sRNA sequences matching four *PAL* s identified from to

|                            | <b>PAL5A</b> | <b>PAL5B</b> | <b>PAL5C</b> | <b>PAL5D</b> | <b>PAL5</b> |
|----------------------------|--------------|--------------|--------------|--------------|-------------|
| Total sRNAs matching       | 812          | 399          | 756          | 230          | 464         |
| Number of unique sequences | <b>39</b>    | <b>201</b>   | <b>11</b>    | <b>12</b>    | <b>1</b>    |
